# Supplementary material for: Long-term impact of COVID-19 hospitalisation among individuals with pre-existing airway diseases in the UK: a multicentre, longitudinal cohort study – PHOSP-COVID
Source: PubMed Central journal article supplement (PMC11247371; doi:10.1183/23120541.00982-2023), 2024-07-15
Supplement: 00982-2023.SUPPLEMENT.pdf [file 00982-2023.SUPPLEMENT.pdf]

# Long-term impact of COVID-19 hospitalisation among individuals with pre-existing airways diseases in the UK: a multicentre, longitudinal cohort study (PHOSP-COVID)

*Omer Elneima, John R Hurst, Carlos Echevarria, Jennifer K Quint, Sam Walker, Salman Siddiqui, Petr Novotny, Paul Pfeiffer, Jeremy S Brown, Manu Shankar-Hari, Hamish JC McAuley, Olivia C Leavy, Aarti Shikotra, Amisha Singapuri, Marco Sereno, Matthew Richardson, Ruth M Saunders, Victoria C Harris, Linzy Houchen-Wolloff, Neil J Greening, Ewen M Harrison, Annemarie B Docherty, Nazir I Lone, James D Chalmers, Ling-Pei Ho, Alex Horsley, Michael Marks, Krishna Poinasamy, Betty Raman, Rachael A Evans, Louise V Wain, Aziz Sheikh, Chris E Brightling, Liam G Heaney, Anthony De Soyza.*

## Contents

|                                       |    |
|---------------------------------------|----|
| Supplementary Methods .....           | 2  |
| Supplementary Tables .....            | 5  |
| Supplementary Figures .....           | 18 |
| PHOSP-COVID Collaborative Group ..... | 20 |
| References .....                      | 34 |

## Supplementary Methods

**Table SM1. Methods and thresholds for processing of variables and outcome measures presented in this analysis.**

|                                                                          | Method                                                                                                                                                                                                                                                                                                                                                                                                                                                                                                                                                |
|--------------------------------------------------------------------------|-------------------------------------------------------------------------------------------------------------------------------------------------------------------------------------------------------------------------------------------------------------------------------------------------------------------------------------------------------------------------------------------------------------------------------------------------------------------------------------------------------------------------------------------------------|
| <b>Tables 1,2 &amp; S4,5,7<br/>Figure SF2 &amp; SF3</b>                  |                                                                                                                                                                                                                                                                                                                                                                                                                                                                                                                                                       |
| Indices of Multiple Deprivation (IMD)                                    | Obtained using postcode <sup>1</sup> . Different modalities used for the devolved nations.                                                                                                                                                                                                                                                                                                                                                                                                                                                            |
| Comorbidities                                                            | A pre-existing comorbidity was considered absent if not indicated by a 'yes' on the case report form.                                                                                                                                                                                                                                                                                                                                                                                                                                                 |
| Admission duration                                                       | Calculated using the hospital discharge date and the earliest admission date to the same or different hospital for the participant's COVID-19 episode.                                                                                                                                                                                                                                                                                                                                                                                                |
| WHO clinical progression scale                                           | WHO classes are as follows: 3–4=no continuous supplemental oxygen needed; 5=continuous supplemental oxygen only; 6=continuous or bi-level positive airway pressure ventilation or high-flow nasal oxygen; and 7–9=invasive mechanical ventilation or other organ support e.g. vasopressors, dialysis or Extracorporeal membrane oxygenation (ECMO) <sup>2</sup> .                                                                                                                                                                                     |
| Generalised Anxiety Disorder Questionnaire (GAD-7) (Anxiety)             | The Generalised Anxiety Disorder (GAD-7) questionnaire is a patient reported outcome measure consisting of 7 questions with total scores ranging from 0 to 21. We used a GAD7 threshold score of > 8 to suggest at least mild-moderate anxiety. <sup>3</sup>                                                                                                                                                                                                                                                                                          |
| Patient Health Questionnaire (PHQ-9) (Depression)                        | The Patient Health Questionnaire (PHQ-9) is a patient reported outcome measure consisting of 9 questions with total scores ranging from 0 to 27. We used a PHQ-9 threshold score of ≥10 to suggest at least moderate depression. <sup>4</sup>                                                                                                                                                                                                                                                                                                         |
| Post-Traumatic Stress Disorder Checklist for DSM V (PCL-5) Questionnaire | The Post-Traumatic Stress Disorder Checklist for DSM V (PCL-5) questionnaire is a patient reported outcome measure consisting of 20 questions assessing evidence of post-traumatic stress disorder according to the DSM V criteria. Total scores range from 0-80. We used a PCL-5 threshold score of ≥38 suggestive of a provisional diagnosis of post-traumatic stress disorder. <sup>5,6</sup>                                                                                                                                                      |
| Dyspnoea-12                                                              | The Dyspnoea-12 questionnaire is a patient reported outcome measure consisting of 12 questions assessing breathlessness severity incorporating both "physical" and "affective" aspects <sup>7</sup> . Scores range from 0 to 36 with higher scores corresponding to greater severity of breathlessness.                                                                                                                                                                                                                                               |
| FACIT fatigue subscale score (FACIT)                                     | The Functional Assessment of Chronic Illness Therapy – Fatigue (FACIT-Fatigue) scale is a patient reported outcome measure consisting of 13 questions to assess self-reported fatigue and its impact on daily activities and function. <sup>8</sup> Total scores range from 0-52, with lower scores corresponding to an increased burden of fatigue. <sup>9</sup>                                                                                                                                                                                     |
| Short Physical Performance Battery (SPPB)                                | The Short Physical Performance Battery (SPPB) test is a researcher administered assessment of physical performance and frailty. It comprises 3 components; balance, gait speed and sit to stand tests. Tests were completed according to recommended standards and training was provided to site staff by the central study team via a recorded demonstration video. SPPB total scores range from 0-12. We have reported a total SPPB score of ≤10 suggestive of underlying frailty and impaired mobility. <sup>10-12</sup>                           |
| Incremental Shuttle Walk Test (ISWT)                                     | The Incremental Shuttle Walk Test (ISWT) is a researcher administered assessment of maximal physical performance and was performed according to standardised instructions with two attempts performed by participants on the same day with a 20 minutes rest between them. <sup>13</sup> Training was provided to site staff by the central study team via a recorded demonstration video. The best effort was reported in metres and the percent predicted value was calculated using the following reference formula accounting for gender, age and |

|                                               |                                                                                                                                                                                                                                                                                                                                                                                                                                                                                                                                                                                                                                                                                                                                                                                                                 |
|-----------------------------------------------|-----------------------------------------------------------------------------------------------------------------------------------------------------------------------------------------------------------------------------------------------------------------------------------------------------------------------------------------------------------------------------------------------------------------------------------------------------------------------------------------------------------------------------------------------------------------------------------------------------------------------------------------------------------------------------------------------------------------------------------------------------------------------------------------------------------------|
|                                               | BMI. <sup>14</sup> (ISWT predicted = $1449 \cdot 701 - (11 \cdot 735 \times \text{age}) + (241 \cdot 897 \times \text{gender}) - (5 \cdot 686 \times \text{BMI})$ , where male gender = 1 and female gender = 0)                                                                                                                                                                                                                                                                                                                                                                                                                                                                                                                                                                                                |
| Rockwood Clinical Frailty Scale (CFS)         | The Rockwood Clinical Frailty Scale (CFS) is a researcher assessed scale of clinical frailty with scores ranging from 1-9 where lower scores correspond to increased frailty. We have reported CFS scores of <5 suggestive of frailty. <sup>15</sup>                                                                                                                                                                                                                                                                                                                                                                                                                                                                                                                                                            |
| Montreal Cognitive Assessment (MoCA)          | The Montreal Cognitive Assessment (MoCA) is a researcher administered cognitive function questionnaire across 8 domains. Training was provided to site staff using standardised resources supplied online by MoCA TEST Inc. <sup>16</sup> The assessment was conducted in English with researchers applying their discretion to exclude participants whose command of English was insufficient to complete the test accurately. Total scores range from 0 to 30. We report total MoCA scores of <23 suggestive of at least Mild Cognitive Impairment. <sup>17</sup>                                                                                                                                                                                                                                             |
| Spirometry and Pulmonary Function Testing     | Due to COVID-19 related restrictions on aerosol-generating procedures during the study period, access to spirometry and lung function was limited. Spirometry and Pulmonary function testing were completed as per ERS/ATS recommendations. <sup>18</sup> Spirometry and Transfer factor values were converted to SI units if not reported as such by sites. Transfer Capacity of the Lung for the uptake of carbon monoxide (TLCO) and carbon monoxide transfer coefficient (KCO) were obtained from the best of two repeat readings. ERS Reference values were used to calculate % predicted values. <sup>19-21</sup> FEV <sub>1</sub> /FVC <0.7 was used to define airflow obstruction. <sup>22</sup> % predicted TLCO <80% was considered indicative of impaired gas transfer.                              |
| BNP / NT-pro BNP                              | Brain Natriuretic Peptide (BNP) or N-terminal pro B-type Natriuretic Peptide (NT-pro BNP) were collected according to each site's routine clinically available assay as a biomarker of heart failure. Three sites submitted BNP results with all of the remaining sites submitting NT-pro BNP results. The threshold values used for BNP was $\geq 100$ ng/litre <sup>23</sup> and for NT-pro BNP $\geq 400$ ng/litre <sup>24</sup> as suggestive of heart failure.                                                                                                                                                                                                                                                                                                                                             |
| Glycated haemoglobin (HbA1c)                  | Glycated haemoglobin (HbA1c) was collected as a biomarker of current glycaemic control. We have reported HbA1c levels $\geq 6.5\%$ as suggestive of a diagnosis of diabetes. <sup>25</sup>                                                                                                                                                                                                                                                                                                                                                                                                                                                                                                                                                                                                                      |
| C-Reactive Protein (CRP)                      | C-Reactive Protein (CRP) levels were collected as a biomarker of current systemic inflammation. Values reported as below the lower or upper limit reportable range for the assay used at the site have been included at the stated less than or more than cut off value for calculation of mean (SD) results. We have reported CRP levels > 5 mg/L as suggestive of systemic inflammation.                                                                                                                                                                                                                                                                                                                                                                                                                      |
| <b>Figure 2, Table S2</b>                     |                                                                                                                                                                                                                                                                                                                                                                                                                                                                                                                                                                                                                                                                                                                                                                                                                 |
| Patient-perceived recovery cluster membership | Four phenotypes of patient-perceived recovery were identified using patient symptom questionnaire, physical performance, and cognitive assessment data from the five-month visit (Dyspnoea-12, FACIT, GAD-7, PHQ-9, PCL-5, SPPB, and MoCA as continuous variables). This was completed using clustering large applications k-medoids approach where the continuous variables scores were centred, normalised, and transformed so that higher burden of disease represented higher values. <sup>26</sup> A Euclidean distance metric was used, and the optimal number of clusters was chosen using a silhouette plot. The four clusters include: very severe mental and physical impairment, severe mental and physical impairment, moderate mental and physical impairment with cognitive impairment, and mild. |
| <b>Table 3, S3,6,8,9<br/>Figure 3, 4</b>      |                                                                                                                                                                                                                                                                                                                                                                                                                                                                                                                                                                                                                                                                                                                                                                                                                 |
| Symptoms at five-month and one-year visits    | Symptom severity was rated using a 0-10 visual analogue scale for Breathlessness, Cough, Fatigue, Sleep quality and Pain before COVID-19 illness and worst in the last 24 hours.                                                                                                                                                                                                                                                                                                                                                                                                                                                                                                                                                                                                                                |
| EQ-5D-5L Utility Index                        | The EQ-5D-5L is a five-dimension patient reported outcome questionnaire recording a patient's self-rated health state for mobility, self-care, usual activities, pain/discomfort and anxiety/depression. These scores are then mapped to a United Kingdom specific Utility Index anchored at 1 for "perfect health" and 0 for "dead" calculated from reported EQ5D-5L scores                                                                                                                                                                                                                                                                                                                                                                                                                                    |

|                                                              |                                                                                                                                                                                                                                                                                                                                                                                                                        |
|--------------------------------------------------------------|------------------------------------------------------------------------------------------------------------------------------------------------------------------------------------------------------------------------------------------------------------------------------------------------------------------------------------------------------------------------------------------------------------------------|
|                                                              | across the five dimensions. <sup>27</sup>                                                                                                                                                                                                                                                                                                                                                                              |
| EQ-5D-5L VAS                                                 | The EQ-5D-5L Visual Analogue Scale is a patient reported outcome questionnaire recording the patient's self-rated health and was completed for "before your COVID-19 illness" and "your own health state today." Scores are presented as mean and standard deviation. <sup>28</sup>                                                                                                                                    |
| Washington Group Short Set of Functioning Severity Continuum | The Washington Group Short Set of Functioning (WG-SS) is a patient reported outcome questionnaire using six questions to assess disability and function. Participant responses were transformed to the "Severity Continuum" by assigning scores of zero to responses "no difficulty", one to responses "some difficulty", six to responses "a lot of difficulty" and 36 to responses "cannot do at all". <sup>29</sup> |

## Supplementary Tables

Table S1: Common prescribed medications on discharge with recorded additional prescription at both research visits

|                        | On discharge          |                 | Changes at 5-month visit |                 | Changes at 1-year visit |                 |
|------------------------|-----------------------|-----------------|--------------------------|-----------------|-------------------------|-----------------|
|                        | Non-airways (n=2,082) | Airways (n=615) | Non-airways (n=1,975)    | Airways (n=595) | Non-airways (n=1,621)   | Airways (n=479) |
| <b>Inhalers</b>        |                       |                 |                          |                 |                         |                 |
| SABA                   | 64 (3.1%)             | 378 (61.5%)     | 19 (1.0%)                | 60 (10.1%)      | 24 (1.5%)               | 20 (4.2%)       |
| LAMA                   | 8 (0.4%)              | 56 (9.1%)       | < 5                      | 12 (2.0%)       | < 5                     | 9 (1.9%)        |
| LABA/LAMA              | < 5                   | 16 (2.6%)       | < 5                      | < 5             | < 5                     | 1 (0.2%)        |
| ICS                    | 22 (1.1%)             | 89 (14.5%)      | 6 (0.3%)                 | 9 (1.5%)        | 10 (0.6%)               | 6 (1.3%)        |
| ICS/LABA               | 18 (0.9%)             | 273 (44.4%)     | 9 (0.5%)                 | 62 (10.4%)      | 6 (0.3%)                | 25 (5.2%)       |
| ICS/LABA/LAMA          | 0                     | 31 (5.0%)       | < 5                      | 7 (1.2%)        | < 5                     | 3 (0.6%)        |
| <b>Diuretics</b>       | 141 (6.8%)            | 73 (11.9%)      | 37 (1.9%)                | 15 (2.5%)       | 22 (1.4%)               | 10 (2.1%)       |
| <b>Carbocisteine</b>   | 31 (1.5%)             | 42 (6.8%)       | 5 (0.3%)                 | 11 (1.8%)       | < 5                     | 3 (0.6%)        |
| <b>Montelukast</b>     | < 5                   | 61 (9.9%)       | < 5                      | 13 (2.2%)       | < 5                     | 7 (1.5%)        |
| <b>Antidepressants</b> | 351 (16.9%)           | 167 (27.2%)     | 86 (4.4%)                | 44 (7.4%)       | 63 (3.9%)               | 33 (6.9%)       |
| <b>Benzodiazepines</b> | 22 (1.1%)             | 9 (1.5%)        | 6 (0.3%)                 | 4 (0.7%)        | 8 (0.5%)                | 0               |

Data are n (%). Percentages are calculated by category after exclusion of missing data for that variable. Changes at both visits refer to new prescription of class medications. SABA= Short-Acting Beta Agonist. LAMA= Long-Acting Muscarinic Antagonist. LABA= Long-Acting Beta Agonist. ICS=Inhaled Corticosteroids.

Table S2: Recovery cluster assignment at five-month stratified by presence or absence of airways disease

|                                   | n   | Pre-existing airways disease (n= 595) | n     | No history of airways diseases (n=1,975) | P value |
|-----------------------------------|-----|---------------------------------------|-------|------------------------------------------|---------|
| Cluster assignment at five-months | 554 |                                       | 1,851 |                                          | 0.000   |
| Mild                              |     | 117 (21.1%)                           |       | 606 (32.7%)                              |         |
| Moderate/cognitive                |     | 108 (19.5%)                           |       | 435 (23.5%)                              |         |
| Severe                            |     | 149 (26.9%)                           |       | 487 (26.3%)                              |         |
| Very severe                       |     | 180 (32.5%)                           |       | 323 (17.5%)                              |         |

Table S3: Participants clinical characteristics at five-month stratified by the different classes of airways diseases

|                                           | n   | COPD (N=136)     | n   | Asthma (N=428)   | n  | Bronchiectasis (N=31) | n     | No history of airways diseases (n=1,975) | P value |
|-------------------------------------------|-----|------------------|-----|------------------|----|-----------------------|-------|------------------------------------------|---------|
| Age†                                      | 136 | 67.2 (8.1)       | 428 | 55.7 (13.0)      | 31 | 62.1 (12.0)           | 1,975 | 57.8 (12.5)                              | 0.000   |
| Sex at birth                              | 136 |                  | 428 |                  | 31 |                       | 1,974 |                                          | 0.000   |
| Male                                      |     | 88 (64.7%)       |     | 196 (45.8%)      |    | 22 (71.0%)            |       | 1,268 (64.2%)                            |         |
| Female                                    |     | 48 (35.3%)       |     | 232 (54.2%)      |    | 9 (29.0%)             |       | 706 (35.8%)                              |         |
| Ethnicity                                 | 136 |                  | 422 |                  | 31 |                       | 1,965 |                                          | 0.000   |
| White                                     |     | 130 (95.6%)      |     | 329 (78.0%)      |    | 27 (87.1%)            |       | 1,428 (72.7%)                            |         |
| Non white                                 |     | 6 (4.4%)         |     | 93 (22.0%)       |    | <5 (12.9%)            |       | 537 (27.3%)                              |         |
| Smoking                                   | 125 |                  | 389 |                  | 25 |                       | 1,774 |                                          | 0.000   |
| Current smoker                            |     | 9 (7.2%)         |     | 12 (3.1%)        |    | <5 (8.0%)             |       | 55 (3.1%)                                |         |
| Ex-smoker                                 |     | 100 (80.0%)      |     | 125 (32.1%)      |    | 9 (36.0%)             |       | 641 (36.1%)                              |         |
| Non smoker                                |     | 16 (12.8%)       |     | 252 (64.8%)      |    | 14 (56.0%)            |       | 1,078 (60.8%)                            |         |
| Index of multiple deprivation index (IMD) | 135 |                  | 426 |                  | 31 |                       | 1,958 |                                          | 0.005   |
| 1 - most deprived                         |     | 46 (34.1%)       |     | 107 (25.1%)      |    | <5 (9.7%)             |       | 432 (22.1%)                              |         |
| 2                                         |     | 31 (23.0%)       |     | 110 (25.8%)      |    | <5 (12.9%)            |       | 456 (23.3%)                              |         |
| 3                                         |     | 18 (13.3%)       |     | 64 (15.0%)       |    | 9 (29.0%)             |       | 351 (17.9%)                              |         |
| 4                                         |     | 17 (12.6%)       |     | 59 (13.9%)       |    | 6 (19.4%)             |       | 362 (18.5%)                              |         |
| 5 - least deprived                        |     | 23 (17.0%)       |     | 86 (20.2%)       |    | 9 (29.0%)             |       | 357 (18.2%)                              |         |
| BMI                                       | 91  |                  | 303 |                  | 25 |                       | 1,379 |                                          |         |
| Median††                                  |     | 30.0 [25.9-33.2] |     | 33.2 [28.5-38.1] |    | 30.9 [29.2-35.0]      |       | 30.7 [27.5-35.2]                         | 0.000   |
| <30 kg/m2                                 |     | 44 (48.4%)       |     | 99 (32.7%)       |    | 9 (36.0%)             |       | 621 (45.0%)                              | 0.001   |
| ≥30 kg/m2                                 |     | 47 (51.6%)       |     | 204 (67.3%)      |    | 16 (64.0%)            |       | 758 (55.0%)                              |         |
| WHO clinical progression scale            | 136 |                  | 428 |                  | 31 |                       | 1,975 |                                          | 0.032   |
| WHO class 3-4                             |     | 27 (19.9%)       |     | 67 (15.6%)       |    | <5 (9.7%)             |       | 326 (16.5%)                              |         |
| WHO class 5                               |     | 66 (48.5%)       |     | 186 (43.5%)      |    | 18 (58.1%)            |       | 820 (41.5%)                              |         |
| WHO class 5                               |     | 34 (25.0%)       |     | 104 (24.3%)      |    | 5 (16.1%)             |       | 452 (22.9%)                              |         |
| WHO class 7-9                             |     | 9 (6.6%)         |     | 71 (16.6%)       |    | 5 (16.1%)             |       | 377 (19.1%)                              |         |
| Median number of comorbidities††          | 136 | 3 [2-5]          | 428 | 2 [0-3]          | 31 | 2 [1-4]               | 1,975 | 1 [0-3]                                  | 0.000   |
| Cardiovascular                            | 136 | 96 (70.6%)       | 428 | 173 (40.4%)      | 31 | 18 (58.1%)            | 1,975 | 896 (45.4%)                              | 0.000   |
| Neuro-psychiatric                         | 136 | 40 (29.4%)       | 428 | 129 (30.1%)      | 31 | 9 (29.0%)             | 1,975 | 357 (18.1%)                              | 0.000   |
| Admission duration, days                  | 136 | 11.3 (11.5)      | 428 | 13.8 (16.7)      | 31 | 20.1 (27.3)           | 1,975 | 14.3 (18.5)                              | 0.071   |
| Systemic steroids                         | 132 | 84 (63.6%)       | 404 | 259 (64.1%)      | 28 | 19 (67.9%)            | 1,880 | 1,037 (55.2%)                            | 0.002   |
| Antibiotic therapy                        | 136 | 107 (78.7%)      | 417 | 333 (79.9%)      | 29 | 27 (93.1%)            | 1,925 | 1,504 (78.1%)                            | 0.233   |
| Anti-coagulants                           | 129 | 50 (38.8%)       | 404 | 175 (43.3%)      | 27 | 14 (51.9%)            | 1,886 | 878 (46.6%)                              | 0.222   |
| <b>PROMS</b>                              |     |                  |     |                  |    |                       |       |                                          |         |
| GAD-7 total score†                        | 125 | 6.1 (6.2)        | 398 | 6.8 (6.0)        | 29 | 7.7 (6.7)             | 1,856 | 4.9 (5.5)                                | 0.001   |

|                                        |     |              |     |              |    |              |       |              |       |
|----------------------------------------|-----|--------------|-----|--------------|----|--------------|-------|--------------|-------|
| Anxiety (GAD-7 >8)                     | 125 | 39 (31.2%)   | 398 | 139 (34.9%)  | 29 | 12 (41.4%)   | 1,856 | 424 (22.8%)  | 0.000 |
| PHQ-9 total score†                     | 124 | 8.3 (7.2)    | 397 | 9.1 (6.8)    | 29 | 9.6 (7.8)    | 1,856 | 6.5 (6.3)    | 0.000 |
| Depression (PHQ-9 ≥10)                 | 124 | 45 (36.3%)   | 397 | 185 (46.6%)  | 29 | 13 (44.8%)   | 1,856 | 491 (26.5%)  | 0.000 |
| Dyspnoea-12†                           | 122 | 12.4 (9.8)   | 389 | 9.5 (9.6)    | 29 | 10.7 (9.4)   | 1,821 | 5.3 (7.4)    | 0.000 |
| FACIT fatigue subscale score†          | 126 | 30.7 (12.6)  | 381 | 29.3 (13.9)  | 28 | 30.1 (14.5)  | 1,791 | 36.1 (12.6)  | 0.000 |
| <b>Physical performance</b>            |     |              |     |              |    |              |       |              |       |
| SPPB total score†                      | 123 | 8.2 (2.8)    | 388 | 9.5 (2.6)    | 28 | 9.5 (2.4)    | 1,803 | 9.9 (2.2)    | 0.000 |
| SPPB ≤10 (impaired mobility)           | 123 | 94 (71.3%)   | 388 | 210 (54.1%)  | 28 | 17 (60.7%)   | 1,803 | 875 (48.5%)  | 0.000 |
| ISWT distance (m)†                     | 82  | 267 (156)    | 321 | 389 (265)    | 19 | 370 (189)    | 1,467 | 441 (267)    | 0.000 |
| ISWT % predicted†                      | 58  | 40.6 (21.8)  | 232 | 55.2 (31.6)  | 15 | 55.2 (27.9)  | 1,032 | 58.7 (29.9)  | 0.000 |
| <b>Frailty and cognition</b>           |     |              |     |              |    |              |       |              |       |
| RCF ≥5                                 | 121 | 22 (18.2%)   | 393 | 41 (10.4%)   | 27 | <5 (7.4%)    | 1,743 | 70 (4.0%)    | 0.000 |
| SARC-F total score†                    | 126 | 3.2 (2.5)    | 386 | 2.7 (2.5)    | 29 | 2.8 (2.3)    | 1,785 | 1.7 (2.1)    | 0.000 |
| Corrected MoCA total score†            | 107 | 25.1 (4.1)   | 349 | 25.9 (3.7)   | 26 | 26.0 (2.6)   | 1,616 | 26.1 (3.4)   | 0.076 |
| Corrected MoCA <23                     | 107 | 22 (20.6%)   | 349 | 47 (13.5%)   | 26 | 5 (19.2%)    | 1,616 | 205 (12.7%)  | 0.101 |
| <b>Lung Physiology</b>                 |     |              |     |              |    |              |       |              |       |
| FEV1 (L) †                             | 72  | 2.03 (0.67)  | 272 | 2.56 (0.75)  | 22 | 2.75 (0.74)  | 1,150 | 2.85 (0.79)  | 0.000 |
| FEV1 % predicted†                      | 68  | 76.0 (22.6)  | 252 | 86.5 (18.1)  | 21 | 88.2 (17.8)  | 1,098 | 91.7 (17.8)  | 0.000 |
| FEV1 % predicted <80%                  | 68  | 38 (55.9%)   | 252 | 90 (35.7%)   | 21 | 7 (33.3%)    | 1,098 | 255 (23.2%)  | 0.000 |
| FVC (L) †                              | 72  | 3.20 (0.82)  | 272 | 3.23 (0.96)  | 22 | 3.42 (1.02)  | 1,151 | 3.55 (1.03)  | 0.001 |
| FVC % predicted†                       | 68  | 91.4 (18.2)  | 252 | 86.3 (17.0)  | 21 | 84.4 (16.1)  | 1,099 | 89.8 (19.0)  | 0.025 |
| FVC % predicted <80%                   | 68  | 19 (27.9%)   | 252 | 90 (35.7%)   | 21 | 7 (33.3%)    | 1,099 | 311 (28.3%)  | 0.131 |
| FEV1/FVC†                              | 72  | 0.63 (0.14)  | 272 | 0.80 (0.10)  | 22 | 0.82 (0.13)  | 1,147 | 0.81 (0.09)  | 0.000 |
| FEV1/FVC <0.7                          | 72  | 44 (61.1%)   | 272 | 33 (12.1%)   | 22 | <5 (13.6%)   | 1,147 | 83 (7.2%)    | 0.000 |
| TLC0†                                  | 20  | 7.4 (3.1)    | 96  | 7.0 (1.9)    | 6  | 6.8 (1.9)    | 389   | 7.5 (2.4)    | 0.254 |
| TLC0 % predicted†                      | 20  | 99.8 (46.2)  | 95  | 89.3 (20.5)  | 6  | 81.5 (27.5)  | 378   | 91.9 (32.5)  | 0.468 |
| TLC0 % predicted <80%                  | 20  | 6 (30.0%)    | 95  | 34 (35.8%)   | 6  | 5 (83.3%)    | 378   | 130 (34.4%)  | 0.091 |
| KCO†                                   | 20  | 1.3 (0.4)    | 100 | 1.5 (0.2)    | 7  | 1.4 (0.2)    | 393   | 1.4 (0.3)    | 0.002 |
| KCO % predicted†                       | 20  | 91.0 (28.5)  | 100 | 104.8 (14.4) | 7  | 97.6 (15.9)  | 380   | 100.5 (20.9) | 0.031 |
| KCO % predicted <80%                   | 20  | 5 (25.0%)    | 100 | <5 (3.0%)    | 7  | <5 (14.3%)   | 380   | 36 (9.5%)    | 0.011 |
| <b>Biochemical Tests</b>               |     |              |     |              |    |              |       |              |       |
| Haemoglobin†                           | 111 | 138.9 (15.4) | 363 | 139.5 (15.6) | 28 | 139.9 (15.9) | 1,642 | 141.4 (15.8) | 0.096 |
| Neutrophils†                           | 111 | 4.6 (1.8)    | 360 | 4.4 (1.8)    | 28 | 4.4 (1.1)    | 1,634 | 4.0 (1.5)    | 0.000 |
| Eosinophils†                           | 110 | 0.27 (0.26)  | 357 | 0.21 (0.20)  | 28 | 0.26 (0.22)  | 1,626 | 0.18 (0.17)  | 0.000 |
| BNP/Pro-NT-BNP above threshold         | 82  | 9 (10.9%)    | 276 | 14 (5.1%)    | 20 | <5 (10.0%)   | 1,197 | 76 (6.4%)    | 0.252 |
| HbA1C ≥6.0                             | 94  | 43 (45.7%)   | 281 | 98 (34.9%)   | 19 | 9 (47.4%)    | 1,236 | 427 (34.6%)  | 0.111 |
| eGFR <60 (ml/min/1.73 m <sup>2</sup> ) | 110 | 17 (15.5%)   | 353 | 37 (10.5%)   | 25 | <5 (12.0%)   | 1,581 | 155 (9.8%)   | 0.297 |
| <b>Systemic inflammation</b>           |     |              |     |              |    |              |       |              |       |
| CRP (mg/L)†                            | 105 | 6.9 (8.8)    | 342 | 6.2 (9.9)    | 25 | 4.0 (3.4)    | 1,582 | 5.2 (11.2)   | 0.196 |

|              |     |            |     |             |    |           |       |             |       |
|--------------|-----|------------|-----|-------------|----|-----------|-------|-------------|-------|
| CRP >5 mg/L  | 105 | 39 (37.1%) | 342 | 102 (29.8%) | 25 | 5 (20.0%) | 1,582 | 348 (22.0%) | 0.000 |
| CRP ≥10 mg/L | 105 | 20 (19.0%) | 342 | 51 (14.9%)  | 25 | <5 (8.0%) | 1,582 | 155 (9.8%)  | 0.002 |

Data are n (%) unless † mean (SD) or †† median [IQR]. Percentages are calculated by category after exclusion of missing data for that variable. IMD=Index of Multiple Deprivation. BMI=body-mass index. WHO classes are as follows: 3–4=no continuous supplemental oxygen needed; 5=continuous supplemental oxygen only; 6=continuous or bi-level positive airway pressure ventilation or high-flow nasal oxygen; and 7–9=invasive mechanical ventilation or other organ support. SARS-CoV-2 PCR=Severe Acute Respiratory Syndrome Coronavirus 2. Polymerase Chain Reaction. GAD7=Generalized Anxiety Disorder 7-item scale. PHQ-9=Patient Health Questionnaire-9. PCL-5=Post Traumatic Stress Disorder Checklist. FACIT fatigue=Functional Assessment of Chronic Illness Therapy Fatigue Scale. SPPB=short physical performance battery. ISWT=incremental shuttle walk test. CFS=Clinical Frailty Scale. MoCA=Montreal Cognitive Assessment. FEV1=Forced expiratory volume measured in 1 second. FVC=forced vital capacity. TLCO=transfer capacity of the lung for carbon monoxide. KCO=carbon monoxide transfer coefficient. BNP=brain natriuretic peptide. NT-BNP=N-terminal BNP. HbA1C=glycated haemoglobin. eGFR=estimated glomerular filtration rate CRP=C-reactive protein. Threshold of BNP ≥100 ng/L or NT-BNP ≥400 ng/L. Corrected MoCA adjusted for level of education. See Table SM1 for further descriptions of variables.

Table S4: Recovery, health related quality of life and symptoms burden at five-month stratified by the different classes of airways diseases

|                                      | n   | COPD (N=136) | n   | Asthma (N=428) | n  | Bronchiectasis (N=31) | n     | No history of airways diseases (n=1,975) | P value |
|--------------------------------------|-----|--------------|-----|----------------|----|-----------------------|-------|------------------------------------------|---------|
| Fully recovered from COVID-19?       | 118 |              | 364 |                | 27 |                       | 1,693 |                                          | 0.007   |
| Yes                                  |     | 24 (20.3%)   |     | 72 (19.8%)     |    | 4 (14.8%)             |       | 467 (27.6%)                              |         |
| No                                   |     | 62 (52.6%)   |     | 223 (61.2%)    |    | 18 (66.7%)            |       | 912 (53.9%)                              |         |
| Not sure                             |     | 32 (27.1%)   |     | 69 (19.0%)     |    | 5 (18.5%)             |       | 314 (18.5%)                              |         |
| Cluster assignment at 5-month        | 129 |              | 396 |                | 29 |                       | 1,851 |                                          | 0.000   |
| Mild                                 |     | 17 (13.2%)   |     | 93 (23.5%)     |    | 7 (24.1%)             |       | 606 (32.7%)                              |         |
| Moderate/cognitive                   |     | 43 (33.3%)   |     | 61 (15.4%)     |    | 4 (13.8%)             |       | 435 (23.5%)                              |         |
| Severe                               |     | 36 (27.9%)   |     | 106 (26.8%)    |    | 7 (24.1%)             |       | 487 (26.3%)                              |         |
| Very severe                          |     | 33 (25.6%)   |     | 136 (34.3%)    |    | 11 (38.0%)            |       | 323 (17.5%)                              |         |
| EQ-5D-5L utility index pre-COVID†    | 116 | 0.66 (0.26)  | 363 | 0.77 (0.27)    | 24 | 0.67 (0.32)           | 1,667 | 0.84 (0.21)                              | 0.000   |
| EQ-5D-5L utility index at 5-month†   | 107 | 0.58 (0.27)  | 354 | 0.64 (0.29)    | 26 | 0.62 (0.29)           | 1,626 | 0.73 (0.24)                              | 0.000   |
| EQ-5D-5L utility index delta change† | 88  | -0.08 (0.23) | 295 | -0.14 (0.26)   | 21 | -0.09 (0.24)          | 1,353 | -0.11 (0.21)                             | 0.090   |
| EQ-5D-5L VAS pre-COVID†              | 118 | 66.8 (18.2)  | 352 | 76.3 (17.9)    | 21 | 69.3 (19.9)           | 1,604 | 81.3 (16.8)                              | 0.000   |
| EQ-5D-5L VAS at 5-month†             | 110 | 61.0 (20.9)  | 352 | 64.4 (21.3)    | 26 | 59.2 (22.0)           | 1,618 | 72.2 (19.2)                              | 0.000   |
| EQ-5D-5L VAS delta change†           | 93  | -6.6 (20.4)  | 285 | -12.0 (21.7)   | 19 | -8.2 (16.3)           | 1,300 | -9.7 (18.8)                              | 0.090   |
| PSQ Breathlessness pre-COVID†        | 106 | 3.9 (2.5)    | 362 | 2.2 (2.5)      | 25 | 2.7 (2.8)             | 1,669 | 0.8 (1.7)                                | 0.000   |
| PSQ Breathlessness at 5-month†       | 112 | 5.3 (2.6)    | 357 | 4.8 (2.9)      | 27 | 4.8 (3.0)             | 1,697 | 3.7 (2.9)                                | 0.000   |
| PSQ Breathlessness delta change†     | 105 | 1.4 (2.9)    | 352 | 2.6 (3.2)      | 24 | 2.0 (2.3)             | 1,628 | 2.9 (3.0)                                | 0.000   |
| PSQ Cough pre-COVID†                 | 104 | 2.0 (2.5)    | 360 | 1.5 (2.4)      | 25 | 2.0 (2.6)             | 1,664 | 0.6 (1.5)                                | 0.000   |
| PSQ Cough at 5-month†                | 110 | 3.2 (2.9)    | 354 | 2.8 (2.9)      | 27 | 3.6 (3.1)             | 1,693 | 1.9 (2.6)                                | 0.000   |
| PSQ Cough delta change†              | 104 | 1.1 (2.7)    | 348 | 1.3 (3.2)      | 24 | 1.3 (2.8)             | 1,622 | 1.3 (2.7)                                | 0.849   |
| PSQ Fatigue pre-COVID†               | 104 | 3.0 (2.6)    | 359 | 1.9 (2.5)      | 25 | 2.7 (3.1)             | 1,664 | 1.4 (2.2)                                | 0.000   |



|                                     |     |           |     |           |    |           |       |           |       |
|-------------------------------------|-----|-----------|-----|-----------|----|-----------|-------|-----------|-------|
| PSQ Fatigue at 5-month†             | 109 | 5.5 (2.9) | 354 | 5.7 (2.9) | 27 | 5.8 (2.9) | 1,693 | 4.5 (3.0) | 0.000 |
| PSQ Fatigue delta change†           | 103 | 2.5 (3.3) | 347 | 3.8 (3.3) | 24 | 2.9 (3.2) | 1,621 | 3.1 (3.2) | 0.001 |
| PSQ Sleep disturbance pre-COVID†    | 105 | 3.2 (2.6) | 358 | 2.6 (2.8) | 25 | 2.7 (2.7) | 1,663 | 1.9 (2.5) | 0.000 |
| PSQ Sleep disturbance at 5-month†   | 110 | 4.6 (3.0) | 354 | 5.0 (3.0) | 27 | 5.1 (2.9) | 1,686 | 3.8 (3.1) | 0.000 |
| PSQ Sleep disturbance delta change† | 104 | 1.4 (2.8) | 345 | 2.3 (3.1) | 24 | 2.1 (2.4) | 1,616 | 1.9 (3.1) | 0.021 |
| PSQ Pain pre-COVID†                 | 103 | 2.6 (2.9) | 360 | 2.2 (2.9) | 26 | 2.3 (3.2) | 1,649 | 1.4 (2.4) | 0.000 |
| PSQ Pain at 5-month†                | 108 | 3.7 (3.2) | 356 | 4.1 (3.4) | 28 | 4.2 (3.6) | 1,677 | 3.0 (3.1) | 0.000 |
| PSQ Pain delta change†              | 102 | 1.0 (2.3) | 350 | 2.0 (3.0) | 25 | 1.8 (2.7) | 1,601 | 1.6 (2.8) | 0.015 |

Missing not included in %. Number (%) unless † mean (SD). EQ-5D-5L VAS = Euroqol five level visual analogue scale 0-100. WG-SS-SCo = Washington Group Short Set of Functioning Severity Continuum. PSQ = Patient Symptoms Questionnaires. See Table SM1 for further descriptions of variables.

Table S5: Participants clinical characteristics at 1-year stratified by the different classes of airways diseases

|                                           | n   | COPD (N=112)     | n   | Asthma (N=346)   | n  | Bronchiectasis (N=21) | n     | No history of airways diseases (n=1,621) | p value |
|-------------------------------------------|-----|------------------|-----|------------------|----|-----------------------|-------|------------------------------------------|---------|
| Age†                                      | 112 | 67.2 (8.1)       | 346 | 56.6 (12.3)      | 21 | 60.9 (12.8)           | 1621  | 58.9 (12.1)                              | 0.000   |
| Sex at birth                              | 112 |                  | 346 |                  | 21 |                       | 1,621 |                                          | 0.000   |
| Male                                      |     | 71 (63.4%)       |     | 165 (47.7%)      |    | 15 (71.4%)            |       | 1,038 (64.0%)                            |         |
| Female                                    |     | 41 (36.6%)       |     | 181 (52.3%)      |    | 6 (28.6%)             |       | 583 (36.0%)                              |         |
| Ethnicity                                 | 111 |                  | 341 |                  | 21 |                       | 1,617 |                                          | 0.000   |
| White                                     |     | 104 (93.7%)      |     | 265 (77.7%)      |    | 19 (90.5%)            |       | 1,221 (75.5%)                            |         |
| Non white                                 |     | 7 (6.3)          |     | 76 (22.3%)       |    | <5 (9.5%)             |       | 396 (24.5%)                              |         |
| Smoking                                   | 99  |                  | 311 |                  | 20 |                       | 1,470 |                                          | 0.000   |
| Current smoker                            |     | 8 (8.1%)         |     | 9 (2.9%)         |    | <5 (5.0%)             |       | 40 (2.7%)                                |         |
| Ex-smoker                                 |     | 76 (76.7%)       |     | 98 (31.5%)       |    | 7 (35.0%)             |       | 549 (37.4%)                              |         |
| Non smoker                                |     | 15 (15.2%)       |     | 204 (65.6%)      |    | 12 (60.0%)            |       | 881 (59.9%)                              |         |
| Index of multiple deprivation index (IMD) | 111 |                  | 346 |                  | 21 |                       | 1,613 |                                          | 0.001   |
| 1 - most deprived                         |     | 38 (34.3%)       |     | 81 (23.4%)       |    | <5 (4.8%)             |       | 346 (21.4%)                              |         |
| 2                                         |     | 24 (21.6%)       |     | 88 (25.4%)       |    | <5 (4.8%)             |       | 347 (21.5%)                              |         |
| 3                                         |     | 17 (15.3%)       |     | 52 (15.0%)       |    | 7 (33.3%)             |       | 306 (18.9%)                              |         |
| 4                                         |     | 11 (9.9%)        |     | 49 (14.2%)       |    | <5 (19.0%)            |       | 307 (19.1%)                              |         |
| 5 - least deprived                        |     | 21 (18.9%)       |     | 76 (22.0%)       |    | 8 (38.1%)             |       | 307 (19.1%)                              |         |
| BMI                                       | 75  |                  | 252 |                  | 19 |                       | 1120  |                                          |         |
| Median††                                  |     | 31.0 [26.9-33.4] |     | 33.0 [28.6-38.2] |    | 30.6 [29.2-37.1]      |       | 30.9 [27.5-35.3]                         | 0.000   |
| <30 kg/m2                                 |     | 32 (42.7%)       |     | 79 (31.4%)       |    | 7 (36.8%)             |       | 495 (44.2%)                              | 0.003   |
| ≥30 kg/m2                                 |     | 43 (57.3%)       |     | 173 (68.6%)      |    | 12 (63.2%)            |       | 625 (55.8%)                              |         |

|                                  |     |             |     |             |    |             |       |               |       |
|----------------------------------|-----|-------------|-----|-------------|----|-------------|-------|---------------|-------|
| WHO clinical progression scale   | 112 |             | 346 |             | 21 |             | 1,621 |               | 0.237 |
| WHO class 3-4                    |     | 22 (19.6%)  |     | 54 (15.6%)  |    | 2 (9.5%)    |       | 243 (15.0%)   |       |
| WHO class 5                      |     | 52 (46.4%)  |     | 147 (42.5%) |    | 11 (52.5%)  |       | 685 (42.3%)   |       |
| WHO class 5                      |     | 30 (26.8%)  |     | 84 (24.3%)  |    | 4 (19.0%)   |       | 386 (23.8%)   |       |
| WHO class 7-9                    |     | 8 (7.2%)    |     | 61 (17.6%)  |    | 4 (19.0%)   |       | 307 (18.9%)   |       |
| Median number of comorbidities†† | 112 | 3 [2-5]     | 346 | 2 [0-3]     | 21 | 2 [1-2]     | 1,621 | 1 [0-3]       | 0.000 |
| Cardiovascular                   | 112 | 80 (71.4%)  | 346 | 144 (41.6%) | 21 | 11 (52.4%)  | 1,621 | 757 (46.7%)   | 0.000 |
| Neuro-psychiatric                | 112 | 30 (26.8%)  | 346 | 99 (28.6%)  | 21 | 4 (19.1%)   | 1,621 | 298 (18.4%)   | 0.000 |
| Admission duration, days†        | 112 | 11.0 (10.9) | 346 | 14.7 (18.1) | 21 | 18.4 (30.1) | 1,621 | 14.8 (19.1)   | 0.155 |
| Systemic steroids                | 111 | 72 (64.9%)  | 324 | 206 (63.6%) | 19 | 12 (63.2%)  | 1,540 | 865 (56.2%)   | 0.035 |
| Antibiotic therapy               | 112 | 86 (76.8%)  | 337 | 265 (78.6%) | 20 | 18 (90%)    | 1,577 | 1,238 (78.5%) | 0.622 |
| Anti-coagulants                  | 106 | 41 (38.7%)  | 324 | 143 (44.1%) | 18 | 7 (38.9%)   | 1,543 | 737 (47.8%)   | 0.192 |
| Recovered from COVID-19?         | 96  |             | 286 |             | 21 |             | 1384  |               | 0.000 |
| Yes                              |     | 21 (21.9%)  |     | 58 (20.3%)  |    | 3 (14.3%)   |       | 459 (33.2%)   |       |
| No                               |     | 48 (50.0%)  |     | 164 (57.3%) |    | 13 (61.9%)  |       | 638 (46.1%)   |       |
| Not sure                         |     | 27 (28.1%)  |     | 64 (22.4%)  |    | 5 (23.8%)   |       | 287 (20.7%)   |       |
| <b>PROMS</b>                     |     |             |     |             |    |             |       |               |       |
| GAD-7 total score†               | 106 | 5.5 (5.9)   | 320 | 6.1 (6.1)   | 21 | 5.2 (6.2)   | 1,503 | 4.8 (5.5)     | 0.001 |
| Anxiety (GAD-7 >8)               | 106 | 30 (28.3%)  | 320 | 94 (29.4%)  | 21 | 6 (28.6%)   | 1,503 | 331 (22.0%)   | 0.023 |
| PHQ-9 total score†               | 106 | 7.0 (6.1)   | 316 | 7.7 (6.7)   | 21 | 6.8 (7.6)   | 1,504 | 6.1 (6.3)     | 0.001 |
| Depression (PHQ-9 ≥10)           | 106 | 28 (26.4%)  | 316 | 104 (32.9%) | 21 | 6 (28.6%)   | 1,504 | 371 (24.7%)   | 0.026 |
| Dyspnoea-12†                     | 102 | 11.0 (8.9)  | 307 | 7.7 (8.6)   | 21 | 7.9 (8.6)   | 1,462 | 4.9 (7.2)     | 0.000 |
| FACIT fatigue subscale score†    | 95  | 32.6 (11.2) | 288 | 32.3 (13.9) | 19 | 37.7 (10.9) | 1,400 | 36.7 (12.4)   | 0.000 |
| <b>Physical performance</b>      |     |             |     |             |    |             |       |               |       |
| SPPB total score†                | 87  | 8.8 (2.4)   | 292 | 9.5 (2.6)   | 18 | 9.6 (2.6)   | 1,397 | 10.2 (2.1)    | 0.000 |
| SPPB ≤10 (impaired mobility)     | 87  | 62 (71.3%)  | 292 | 157 (53.8%) | 18 | 9 (50.0%)   | 1,397 | 632 (45.2%)   | 0.000 |
| ISWT distance (m) †              | 57  | 273 (170)   | 223 | 422 (267)   | 15 | 424 (261)   | 1104  | 456 (267)     | 0.000 |
| ISWT % predicted†                | 41  | 40.7 (24.8) | 172 | 56.9 (31.2) | 13 | 57.6 (33.1) | 796   | 60.8 (30.3)   | 0.000 |
| <b>Frailty and cognition</b>     |     |             |     |             |    |             |       |               |       |
| RCF ≥5                           | 98  | 18 (18.4%)  | 306 | 26 (8.5%)   | 18 | 1 (5.6%)    | 1,463 | 59 (4.0%)     | 0.000 |
| SARC-F total score†              | 95  | 2.9 (2.4)   | 289 | 2.3 (2.5)   | 19 | 1.9 (1.9)   | 1,405 | 1.7 (2.1)     | 0.000 |
| Corrected MoCA total score†      | 86  | 25.9 (3.4)  | 273 | 26.9 (3.2)  | 20 | 27.9 (2.3)  | 1,303 | 26.6 (3.3)    | 0.030 |
| Corrected MoCA <23               | 86  | 14 (16.3%)  | 273 | 24 (8.8%)   | 20 | <5 (5.0%)   | 1,303 | 139 (10.7%)   | 0.208 |
| <b>Lung Physiology</b>           |     |             |     |             |    |             |       |               |       |
| FEV1 (L) †                       | 44  | 2.10 (0.66) | 186 | 2.60 (0.81) | 11 | 2.96 (0.79) | 840   | 2.89 (0.80)   | 0.000 |
| FEV1 % predicted†                | 41  | 79.9 (23.3) | 179 | 87.4 (20.6) | 11 | 97.3 (16.4) | 820   | 93.2 (17.4)   | 0.000 |
| FEV1 % predicted <80%            | 41  | 18 (43.9%)  | 179 | 65 (36.3%)  | 11 | 1 (9.1%)    | 820   | 173 (21.1%)   | 0.000 |
| FVC (L)†                         | 44  | 3.19 (0.83) | 186 | 3.33 (1.01) | 11 | 3.75 (0.94) | 843   | 3.61 (1.01)   | 0.001 |
| FVC % predicted†                 | 41  | 92.6 (19.6) | 179 | 88.6 (20.9) | 11 | 96.4 (11.3) | 823   | 91.2 (17.8)   | 0.237 |

|                                        |    |              |     |              |    |              |       |              |       |
|----------------------------------------|----|--------------|-----|--------------|----|--------------|-------|--------------|-------|
| FVC % predicted <80%                   | 41 | 13 (31.7%)   | 179 | 64 (35.8%)   | 11 | 1 (9.1%)     | 823   | 188 (22.8%)  | 0.001 |
| FEV1/FVC†                              | 44 | 0.66 (0.12)  | 186 | 0.79 (0.20)  | 11 | 0.79 (0.08)  | 840   | 0.81 (0.11)  | 0.000 |
| FEV1/FVC <0.7                          | 44 | 22 (50.0%)   | 186 | 32 (17.2%)   | 11 | 1 (9.1%)     | 840   | 63 (7.5%)    | 0.000 |
| TLCO†                                  | 17 | 7.08 (2.88)  | 55  | 7.81 (2.21)  | 4  | 7.37 (1.11)  | 264   | 7.69 (2.36)  | 0.722 |
| TLCO % predicted†                      | 17 | 98.2 (45.8)  | 55  | 96.6 (21.7)  | 4  | 94.1 (9.1)   | 261   | 94.9 (29.7)  | 0.958 |
| TLCO % predicted <80%                  | 17 | 6 (35.3%)    | 55  | 12 (21.8%)   | 4  | 0            | 261   | 60 (23.0%)   | 0.445 |
| KCO†                                   | 17 | 1.30 (0.33)  | 59  | 1.52 (0.25)  | 4  | 1.28 (0.19)  | 273   | 1.44 (0.27)  | 0.009 |
| KCO % predicted†                       | 17 | 92.4 (22.2)  | 59  | 105.3 (16.2) | 4  | 92.0 (11.4)  | 270   | 100.0 (17.3) | 0.027 |
| KCO % predicted <80%                   | 17 | 5 (29.4%)    | 59  | 4 (6.8%)     | 4  | 0            | 270   | 24 (8.9%)    | 0.030 |
| <b>Biochemical Tests</b>               |    |              |     |              |    |              |       |              |       |
| Haemoglobin†                           | 89 | 140.8 (15.9) | 275 | 139.0 (15.8) | 19 | 143.1 (13.3) | 1,279 | 141.6 (14.8) | 0.069 |
| Neutrophils†                           | 89 | 5.0 (2.2)    | 274 | 4.5 (2.2)    | 18 | 4.8 (1.3)    | 1,275 | 4.0 (1.5)    | 0.000 |
| Eosinophils†                           | 89 | 0.23 (0.19)  | 274 | 0.21 (0.18)  | 18 | 0.28 (0.16)  | 1,273 | 0.19 (0.18)  | 0.006 |
| BNP/Pro-NT-BNP above threshold         | 53 | 8 (15.1%)    | 169 | 13 (7.7%)    | 15 | 2 (13.3%)    | 824   | 68 (8.3%)    | 0.310 |
| HbA1C ≥6.0                             | 64 | 33 (51.6%)   | 199 | 66 (33.2%)   | 16 | 8 (50.0%)    | 1,008 | 355 (35.2%)  | 0.029 |
| eGFR <60 (ml/min/1.73 m <sup>2</sup> ) | 85 | 12 (14.1%)   | 261 | 32 (12.3%)   | 13 | 2 (15.4%)    | 1,227 | 153 (12.5%)  | 0.959 |
| <b>Systemic inflammation</b>           |    |              |     |              |    |              |       |              |       |
| CRP (mg/L) †                           | 79 | 5.8 (5.8)    | 277 | 5.9 (6.6)    | 18 | 5.4 (6.7)    | 1,260 | 4.9 (7.0)    | 0.143 |
| CRP >5 mg/L                            | 79 | 26 (32.9%)   | 277 | 83 (29.9%)   | 18 | 5 (27.8%)    | 1,260 | 278 (22.1%)  | 0.009 |
| CRP ≥10 mg/L                           | 79 | 10 (12.7%)   | 277 | 42 (15.2%)   | 18 | 1 (5.6%)     | 1,260 | 120 (9.5%)   | 0.037 |

Data are n (%) unless † mean (SD) or †† median [IQR]. Percentages are calculated by category after exclusion of missing data for that variable. IMD=Index of Multiple Deprivation. BMI=body-mass index. WHO classes are as follows: 3–4=no continuous supplemental oxygen needed; 5=continuous supplemental oxygen only; 6=continuous or bi-level positive airway pressure ventilation or high-flow nasal oxygen; and 7–9=invasive mechanical ventilation or other organ support. SARS-CoV-2 PCR=Severe Acute Respiratory Syndrome Coronavirus 2. Polymerase Chain Reaction. GAD7=Generalized Anxiety Disorder 7-item scale. PHQ-9=Patient Health Questionnaire-9. PCL-5=Post Traumatic Stress Disorder Checklist. FACIT fatigue=Functional Assessment of Chronic Illness Therapy Fatigue Scale. SPPB=short physical performance battery. ISWT=incremental shuttle walk test. CFS=Clinical Frailty Scale. MoCA=Montreal Cognitive Assessment. FEV1=Forced expiratory volume measured in 1 second. FVC=forced vital capacity. TLCO=transfer capacity of the lung for carbon monoxide. KCO=carbon monoxide transfer coefficient. BNP=brain natriuretic peptide. NT-BNP=N-terminal BNP. HbA1C=glycated haemoglobin. eGFR=estimated glomerular filtration rate CRP=C-reactive protein. Threshold of BNP ≥100 ng/L or NT-BNP ≥400 ng/L. Corrected MoCA adjusted for level of education. See Table SM1 for further descriptions of variables.

Table S6: Recovery, health related quality of life and symptoms burden at the 1-year stratified by the different classes of airways diseases

|                                      | n   | COPD (N=112) | n   | Asthma (N=346) | n  | Bronchiectasis (N=21) | n     | No history of airways diseases (n=1621) | p value |
|--------------------------------------|-----|--------------|-----|----------------|----|-----------------------|-------|-----------------------------------------|---------|
| Recovered from COVID-19?             | 96  |              | 286 |                | 21 |                       | 1384  |                                         | 0.000   |
| Yes                                  |     | 21 (21.9%)   |     | 58 (20.3%)     |    | 3 (14.3%)             |       | 459 (33.2%)                             |         |
| No                                   |     | 48 (50.0%)   |     | 164 (57.3%)    |    | 13 (61.9%)            |       | 638 (46.1%)                             |         |
| Not sure                             |     | 27 (28.1%)   |     | 64 (22.4%)     |    | 5 (23.8%)             |       | 287 (20.7%)                             |         |
| EQ-5D-5L utility index pre-COVID†    | 101 | 0.66 (0.25)  | 302 | 0.77 (0.27)    | 19 | 0.77 (0.27)           | 1399  | 0.84 (0.21)                             | 0.000   |
| EQ-5D-5L utility index at 1-year†    | 94  | 0.61 (0.24)  | 280 | 0.65 (0.28)    | 16 | 0.63 (0.29)           | 1350  | 0.73 (0.25)                             | 0.000   |
| EQ-5D-5L utility index delta change† | 84  | -0.05 (0.18) | 240 | -0.12 (0.25)   | 14 | -0.02 (0.29)          | 1160  | -0.11 (0.22)                            | 0.031   |
| EQ-5D-5L VAS pre-COVID†              | 101 | 67.7 (18.9)  | 293 | 77.2 (18.3)    | 16 | 71.3 (21.4)           | 1342  | 81.1 (16.6)                             | 0.000   |
| EQ-5D-5L VAS at 1-year†              | 95  | 63.8 (19.6)  | 274 | 68.4 (21.5)    | 15 | 67.1 (24.8)           | 1347  | 71.3 (20.4)                             | 0.002   |
| EQ-5D-5L VAS delta change†           | 84  | -2.6 (17.2)  | 228 | -11.1 (20.2)   | 11 | 0.1 (29.2)            | 1112  | -10.2 (19.7)                            | 0.002   |
| PSQ Breathlessness pre-COVID†        | 56  | 3.9 (2.4)    | 183 | 2.3 (2.3)      | 17 | 1.6 (1.9)             | 837   | 0.8 (1.6)                               | 0.000   |
| PSQ Breathlessness at 1-year†        | 90  | 4.3 (2.6)    | 289 | 3.5 (2.7)      | 19 | 2.7 (2.9)             | 1372  | 2.4 (2.5)                               | 0.000   |
| PSQ Breathlessness delta change†     | 51  | 0.6 (2.6)    | 175 | 1.5 (2.8)      | 17 | 0.9 (2.4)             | 805   | 2.0 (2.7)                               | 0.000   |
| PSQ Cough pre-COVID†                 | 56  | 2.2 (2.7)    | 183 | 1.2 (1.9)      | 17 | 1.6 (2.1)             | 836   | 0.6 (1.5)                               | 0.000   |
| PSQ Cough at 1-year†                 | 90  | 2.5 (2.4)    | 286 | 1.9 (2.5)      | 19 | 1.9 (2.6)             | 1368  | 1.3 (2.1)                               | 0.000   |
| PSQ Cough delta change†              | 51  | 0.3 (2.7)    | 173 | 0.8 (2.4)      | 17 | 0.2 (1.8)             | 801   | 0.9 (2.3)                               | 0.149   |
| PSQ Fatigue pre-COVID†               | 56  | 2.9 (2.6)    | 183 | 1.8 (2.3)      | 17 | 2.2 (2.6)             | 831   | 1.3 (2.0)                               | 0.000   |
| PSQ Fatigue at 1-year†               | 88  | 4.2 (2.6)    | 289 | 4.3 (3.1)      | 19 | 3.8 (3.0)             | 1369  | 3.3 (2.9)                               | 0.000   |
| PSQ Fatigue delta change†            | 51  | 1.5 (3.2)    | 175 | 2.8 (3.3)      | 17 | 1.7 (3.6)             | 799   | 2.4 (3.1)                               | 0.037   |
| PSQ Sleep disturbance pre-COVID†     | 54  | 3.3 (3.1)    | 184 | 2.4 (2.6)      | 17 | 1.2 (1.6)             | 836   | 1.8 (2.4)                               | 0.000   |
| PSQ Sleep disturbance at 1-year†     | 89  | 4.0 (3.1)    | 290 | 4.0 (3.1)      | 19 | 2.5 (2.2)             | 1,368 | 3.3 (3.0)                               | 0.000   |
| PSQ Sleep disturbance delta change†  | 50  | 0.7 (2.6)    | 176 | 1.8 (3.0)      | 17 | 1.1 (2.3)             | 805   | 1.6 (2.9)                               | 0.000   |
| PSQ Pain pre-COVID†                  | 56  | 3.1 (2.9)    | 180 | 2.2 (2.7)      | 17 | 1.5 (2.3)             | 836   | 1.4 (2.3)                               | 0.000   |
| PSQ Pain at 1-year†                  | 90  | 3.2 (3.0)    | 287 | 3.4 (3.1)      | 19 | 2.5 (3.0)             | 1,363 | 2.5 (2.8)                               | 0.000   |
| PSQ Pain delta change†               | 51  | 0.5 (2.6)    | 171 | 1.4 (2.8)      | 17 | 0.9 (2.4)             | 800   | 1.3 (2.6)                               | 0.145   |

Missing not included in %. Number (%) unless † mean (SD). EQ-5D-5L VAS = Euroqol five level visual analogue scale 0-100. WG-SS-SCo = Washington Group Short Set of Functioning Severity Continuum. PSQ = Patient Symptoms Questionnaires. See Table SM1 for further descriptions of variables.

Table S7: The clinical characteristic of the participants with pre-existing airways stratified by recovery status at both the five-month and one-year research visits.

|                                           | 5-month visit |                   |     |                       |         | 1-year visit |                  |     |                       |         |
|-------------------------------------------|---------------|-------------------|-----|-----------------------|---------|--------------|------------------|-----|-----------------------|---------|
|                                           | n             | Recovered (n=100) | n   | Not recovered (n=409) | P value | n            | Recovered (n=82) | n   | Not recovered (n=321) | p value |
| <b>PROMS</b>                              |               |                   |     |                       |         |              |                  |     |                       |         |
| GAD-7 total score <sup>†</sup>            | 92            | 4.6 (5.8)         | 389 | 7.4 (6.2)             | 0.001   | 82           | 3.2 (5.2)        | 308 | 6.7 (6.1)             | 0.000   |
| Anxiety (GAD-7 >8)                        | 92            | 19 (20.7%)        | 389 | 150 (38.6%)           | 0.001   | 82           | 11 (13.4%)       | 308 | 103 (33.4%)           | 0.000   |
| PHQ-9 total score <sup>†</sup>            | 92            | 5.7 (6.2)         | 389 | 9.9 (6.7)             | 0.000   | 82           | 3.9 (5.2)        | 305 | 8.4 (6.6)             | 0.009   |
| Depression (PHQ-9 ≥10)                    | 92            | 19 (20.7%)        | 389 | 196 (50.4%)           | 0.000   | 82           | 11 (13.4%)       | 305 | 109 (35.7%)           | 0.000   |
| PCL-5 total score <sup>†</sup>            | 92            | 10.7 (14.7)       | 388 | 22.9 (19.4)           | 0.000   | 81           | 7.9 (12.1)       | 304 | 19.5 (18.5)           | 0.000   |
| PTSD (PCL-5 ≥38)                          | 92            | 7 (7.6%)          | 388 | 90 (23.2%)            | 0.001   | 81           | 4 (4.9%)         | 304 | 56 (18.4%)            | 0.003   |
| Dyspnoea-12 <sup>†</sup>                  | 89            | 5.2 (7.5)         | 382 | 11.7 (9.9)            | 0.000   | 82           | 4.1 (7.5)        | 292 | 9.6 (8.7)             | 0.000   |
| FACIT fatigue subscale score <sup>†</sup> | 90            | 39.0 (11.8)       | 380 | 27.0 (13.0)           | 0.000   | 80           | 41.1 (10.5)      | 289 | 30.3 (12.7)           | 0.000   |
| <b>Physical performance</b>               |               |                   |     |                       |         |              |                  |     |                       |         |
| SPPB total score <sup>†</sup>             | 93            | 9.8 (2.5)         | 370 | 8.0 (2.7)             | 0.006   | 63           | 10.1 (2.5)       | 278 | 9.2 (2.4)             | 0.006   |
| SPPB ≤10 (impaired mobility)              | 93            | 47 (50.5%)        | 370 | 237 (64.1%)           | 0.017   | 63           | 27 (42.9%)       | 278 | 174 (62.6%)           | 0.004   |
| ISWT distance (m) <sup>†</sup>            | 63            | 472 (317)         | 293 | 327 (210)             | 0.000   | 47           | 483 (246)        | 211 | 352 (235)             | 0.001   |
| ISWT % predicted <sup>†</sup>             | 45            | 64.9 (36.0)       | 214 | 48.9.0 (27.9)         | 0.001   | 33           | 59.3 (26.3)      | 169 | 51.0 (30.6)           | 0.147   |
| <b>Frailty and cognition</b>              |               |                   |     |                       |         |              |                  |     |                       |         |
| RCF ≥5                                    | 91            | 6 (6.6%)          | 381 | 52 (13.7%)            | 0.066   | 73           | 7 (9.6%)         | 292 | 30 (10.3%)            | 0.862   |
| SARC-F total score <sup>†</sup>           | 92            | 2.3 (2.6)         | 383 | 3.0 (2.5)             | 0.009   | 79           | 1.4 (2.3)        | 290 | 2.8 (2.4)             | 0.000   |
| Corrected MoCA total score <sup>†</sup>   | 75            | 25.5 (3.5)        | 340 | 25.6 (3.8)            | 0.811   | 62           | 26.2 (4.1)       | 263 | 26.8 (3.0)            | 0.186   |
| Corrected MoCA <23                        | 75            | 12 (16.0%)        | 340 | 56 (16.5%)            | 0.921   | 62           | 8 (12.9%)        | 237 | 26 (9.9%)             | 0.485   |
| <b>Lung Physiology</b>                    |               |                   |     |                       |         |              |                  |     |                       |         |
| FEV1 (L) <sup>†</sup>                     | 54            | 2.40 (0.81)       | 267 | 2.47 (0.75)           | 0.557   | 37           | 2.59 (0.78)      | 165 | 2.50 (0.82)           | 0.549   |
| FEV1 % predicted <sup>†</sup>             | 53            | 82.3 (20.0)       | 247 | 84.9 (19.2)           | 0.387   | 35           | 86.9 (15.6)      | 161 | 85.8 (22.8)           | 0.805   |
| FEV1 % predicted <80%                     | 53            | 24 (45.3%)        | 247 | 97 (39.3%)            | 0.418   | 35           | 11 (31.4%)       | 161 | 61 (37.9%)            | 0.472   |
| FVC (L) <sup>†</sup>                      | 54            | 3.18 (0.92)       | 267 | 3.22 (0.92)           | 0.764   | 37           | 3.49 (0.93)      | 165 | 3.28 (0.99)           | 0.253   |
| FVC % predicted <sup>†</sup>              | 53            | 86.6 (18.4)       | 247 | 87.0 (17.0)           | 0.874   | 35           | 93.5 (15.4)      | 161 | 88.1 (21.4)           | 0.166   |
| FVC % predicted <80%                      | 53            | 14 (26.4%)        | 247 | 87 (35.2%)            | 0.218   | 35           | 8 (22.9%)        | 161 | 61 (37.9%)            | 0.092   |
| FEV1/FVC <sup>†</sup>                     | 54            | 0.75 (0.13)       | 267 | 0.77 (0.12)           | 0.383   | 37           | 0.74 (0.10)      | 165 | 0.76 (0.13)           | 0.394   |
| FEV1/FVC <0.7                             | 54            | 14 (25.9%)        | 267 | 55 (20.6%)            | 0.385   | 37           | 9 (24.3%)        | 165 | 38 (23.0%)            | 0.881   |
| TLCO <sup>†</sup>                         | 13            | 8.18 (2.09)       | 105 | 6.93 (2.12)           | 0.048   | 12           | 8.98 (2.45)      | 54  | 7.17 (2.19)           | 0.014   |
| TLCO % predicted <sup>†</sup>             | 13            | 100.6 (27.9)      | 105 | 89.8 (26.8)           | 0.178   | 12           | 109.2 (32.7)     | 54  | 92.3 (28.1)           | 0.074   |
| TLCO % predicted <80%                     | 13            | 3 (23.1%)         | 105 | 40 (38.1%)            | 0.289   | 12           | 1 (8.3%)         | 54  | 17 (31.5%)            | 0.103   |
| KCO <sup>†</sup>                          | 13            | 1.60 (0.28)       | 110 | 1.48 (0.28)           | 0.152   | 12           | 1.52 (0.31)      | 58  | 1.43 (0.28)           | 0.297   |
| KCO % predicted <sup>†</sup>              | 13            | 107.5 (15.4)      | 110 | 102.1 (18.1)          | 0.309   | 12           | 102.9 (18.7)     | 58  | 99.7 (17.7)           | 0.575   |

|                                        |    |               |     |               |       |    |               |     |               |       |
|----------------------------------------|----|---------------|-----|---------------|-------|----|---------------|-----|---------------|-------|
| KCO % predicted <80%                   | 13 | 1 (7.7%)      | 110 | 7 (6.7%)      | 0.854 | 12 | 1 (8.3%)      | 58  | 8 (13.8%)     | 0.607 |
| <b>Biochemical Tests</b>               |    |               |     |               |       |    |               |     |               |       |
| Haemoglobin†                           | 82 | 139.5 (17.3)  | 352 | 139.4 (14.4)  | 0.955 | 57 | 139.8 (17.9)  | 269 | 138.4 (18.4)  | 0.596 |
| Neutrophils†                           | 82 | 4.22 (1.63)   | 351 | 4.53 (1.85)   | 0.158 | 57 | 4.91 (3.11)   | 267 | 4.57 (2.00)   | 0.301 |
| Eosinophils†                           | 82 | 0.27 (0.27)   | 348 | 0.21 (0.17)   | 0.011 | 56 | 0.28 (0.23)   | 267 | 0.21 (0.17)   | 0.016 |
| BNP/Pro-NT-BNP above threshold         | 65 | 7 (10.8%)     | 263 | 17 (6.5%)     | 0.233 | 35 | 6 (17.1%)     | 169 | 15 (8.9%)     | 0.143 |
| HbA1C ≥6.0                             | 64 | 23 (35.9%)    | 277 | 113 (40.8%)   | 0.475 | 36 | 12 (33.3%)    | 202 | 81 (40.1%)    | 0.443 |
| eGFR <60 (ml/min/1.73 m <sup>2</sup> ) | 80 | 13 (16.3%)    | 344 | 40 (11.6%)    | 0.260 | 54 | 9 (16.7%)     | 249 | 31 (12.5%)    | 0.407 |
| <b>Systemic inflammation</b>           |    |               |     |               |       |    |               |     |               |       |
| CRP (mg/L)†                            | 80 | 7.1 (15.8)    | 331 | 5.8 (7.3)     | 0.362 | 58 | 4.8 (4.8)     | 259 | 5.6 (6.2)     | 0.362 |
| CRP >5 mg/L                            | 80 | 18 (22.5%)    | 331 | 101 (30.5%)   | 0.156 | 58 | 13 (22.4%)    | 259 | 77 (29.7%)    | 0.264 |
| CRP ≥10 mg/L                           | 80 | 11 (13.8%)    | 331 | 49 (14.8%)    | 0.811 | 58 | 7 (12.1%)     | 259 | 32 (12.4%)    | 0.952 |
| <b>HRQoL, symptoms</b>                 |    |               |     |               |       |    |               |     |               |       |
| EQ-5D-5L utility index pre-COVID†      | 85 | 0.80 (0.25)   | 347 | 0.71 (0.28)   | 0.005 | 69 | 0.83 (0.18)   | 286 | 0.72 (0.28)   | 0.002 |
| EQ-5D-5L utility index at the visit†   | 82 | 0.76 (0.25)   | 344 | 0.58 (0.28)   | 0.000 | 76 | 0.79 (0.26)   | 284 | 0.60 (0.27)   | 0.000 |
| EQ-5D-5L utility index delta change†   | 68 | - 0.04 (0.23) | 285 | - 0.14 (0.26) | 0.004 | 63 | - 0.02 (0.17) | 250 | - 0.11 (0.25) | 0.007 |
| EQ-5D-5L VAS pre-COVID†                | 85 | 79.5 (18.0)   | 338 | 71.6 (19.1)   | 0.001 | 68 | 80.0 (17.5)   | 273 | 73.6 (19.2)   | 0.013 |
| EQ-5D-5L VAS at the visit†             | 83 | 74.5 (18.4)   | 347 | 59.9 (21.3)   | 0.000 | 74 | 77.4 (17.3)   | 280 | 63.9 (21.3)   | 0.000 |
| EQ-5D-5L VAS delta change†             | 69 | - 4.9 (14.9)  | 281 | - 12.6 (23.0) | 0.009 | 62 | - 2.2 (16.4)  | 238 | - 10.4 (21.4) | 0.006 |
| WG-SS disability                       | 96 | 18 (18.8%)    | 402 | 154 (38.3%)   | 0.000 | 81 | 9 (11.1%)     | 318 | 119 (37.4%)   | 0.000 |
| PSQ Breathlessness pre-COVID†          | 94 | 2.3 (2.5)     | 380 | 2.7 (2.6)     | 0.188 | 46 | 2.2 (2.1)     | 192 | 2.7 (2.5)     | 0.218 |
| PSQ Breathlessness at the visit†       | 95 | 3.0 (2.9)     | 387 | 5.5 (2.6)     | 0.000 | 78 | 1.9 (2.1)     | 312 | 4.1 (2.7)     | 0.000 |
| PSQ Breathlessness delta change†       | 93 | 0.7 (2.8)     | 374 | 2.8 (3.0)     | 0.000 | 46 | 0.0 (2.0)     | 191 | 1.6 (2.8)     | 0.001 |
| PSQ Cough pre-COVID†                   | 92 | 1.4 (2.2)     | 378 | 1.7 (2.4)     | 0.240 | 46 | 1.0 (1.9)     | 193 | 1.5 (2.2)     | 0.144 |
| PSQ Cough at the visit†                | 95 | 1.8 (2.5)     | 382 | 3.2 (3.0)     | 0.000 | 78 | 0.9 (1.7)     | 309 | 2.3 (2.6)     | 0.000 |
| PSQ Cough delta change†                | 92 | 0.5 (2.7)     | 370 | 1.5 (3.1)     | 0.003 | 46 | -0.2 (1.8)    | 190 | 0.8 (2.4)     | 0.011 |
| PSQ Fatigue pre-COVID†                 | 94 | 1.9 (2.5)     | 376 | 2.3 (2.7)     | 0.158 | 46 | 2.1 (2.6)     | 193 | 2.0 (2.4)     | 0.804 |
| PSQ Cough at the visit†                | 94 | 3.2 (2.9)     | 382 | 6.3 (2.6)     | 0.000 | 78 | 1.9 (2.2)     | 310 | 4.9 (2.8)     | 0.000 |
| PSQ fatigue delta change†              | 93 | 1.4 (2.8)     | 367 | 4.0 (3.3)     | 0.000 | 46 | 0.2 (2.6)     | 192 | 3.0 (3.3)     | 0.000 |

Data are n (%) unless † mean (SD). Percentages are calculated by category after exclusion of missing data for that variable. GAD7=Generalized Anxiety Disorder 7-item scale. PHQ-9=Patient Health Questionnaire-9. PCL-5=Post Traumatic Stress Disorder Checklist. FACIT fatigue=Functional Assessment of Chronic Illness Therapy Fatigue Scale. SPPB=short physical performance battery. ISWT=incremental shuttle walk test. CFS=Clinical Frailty Scale. MoCA=Montreal Cognitive Assessment. FEV1=Forced expiratory volume measured in 1 second. FVC=forced vital capacity. TLC=transfer capacity of the lung for carbon monoxide. KCO=carbon monoxide transfer coefficient. BNP=brain natriuretic peptide. NT-BNP=N-terminal BNP. HbA1C=glycated haemoglobin. eGFR=estimated glomerular filtration rate CRP=C-reactive protein. HRQoL=Health Related Quality of Life. EQ-5D-5L VAS = Euroqol five level visual analogue scale 0-100. WG-SS-ScO = Washington Group Short Set of Functioning Severity Continuum. PSQ = Patient Symptoms Questionnaires. Threshold of BNP ≥100 ng/L or NT-BNP ≥400 ng/L. Corrected MoCA adjusted for level of education. See Table SM1 for further descriptions of variables.

Table S8: Multivariable logistic regression predicting recovery at 1-year in the airways group.

|                                           | n  | Recovered (n=82) | n   | Not recovered (n=321) | p value | Univariate OR (95% CI, p)  | Multivariate OR (95% CI, p) |
|-------------------------------------------|----|------------------|-----|-----------------------|---------|----------------------------|-----------------------------|
| Age†                                      | 82 | 61.5 (14.9)      | 321 | 59.5 (11.1)           | 0.181   | 1.01 (0.99-1.04, p= 0.181) |                             |
| Age as a factor                           | 82 |                  | 321 |                       | 0.014   |                            |                             |
| <50                                       |    | 17 (20.7%)       |     | 55 (17.1%)            |         | 2.25 (1.03-4.91, p=0.041)  | 1.61 (0.54-4.78, p=0.394)   |
| 50-59                                     |    | 14 (17.1%)       |     | 102 (31.8%)           |         | -                          | -                           |
| 60-69                                     |    | 26 (31.7%)       |     | 107 (33.3%)           |         | 1.77 (0.88-3.58, p=0.112)  | 1.57 (0.63-3.88, p=0.329)   |
| +70                                       |    | 25 (30.5%)       |     | 57 (17.8%)            |         | 3.19 (1.54-6.63, p=0.002)  | 2.48 (0.87-7.09, p=0.088)   |
| Sex at birth                              | 82 |                  | 321 |                       | 0.036   |                            |                             |
| Male                                      |    | 54 (65.9%)       |     | 170 (52.9%)           |         | -                          | -                           |
| Female                                    |    | 28 (34.1%)       |     | 151 (47.1%)           |         | 0.58 (0.35-0.97, p=0.037)  | 0.50 (0.24-1.03, p=0.059)   |
| Ethnicity                                 | 82 |                  | 317 |                       | 0.356   |                            |                             |
| White                                     |    | 65 (79.3%)       |     | 265 (83.6%)           |         | -                          | -                           |
| Non-White                                 |    | 17 (20.7%)       |     | 52 (16.4%)            |         | 1.33 (0.72-2.46, p=0.357)  | 1.74 (0.77-3.96, p=0.184)   |
| Index of multiple deprivation index (IMD) | 82 |                  | 320 |                       | 0.823   |                            |                             |
| 1 - most deprived                         |    | 18 (21.9%)       |     | 87 (27.2%)            |         | 0.65 (0.30-1.43, p=0.284)  | 0.73 (0.24-2.29, p=0.595)   |
| 2                                         |    | 19 (23.2%)       |     | 75 (23.4%)            |         | 0.80 (0.36-1.74, p=0.569)  | 0.61 (0.19-1.97, p=0.412)   |
| 3                                         |    | 14 (17.1%)       |     | 44 (13.8%)            |         | -                          | -                           |
| 4                                         |    | 11 (13.4%)       |     | 46 (14.4%)            |         | 0.75 (0.31-1.83, p=0.530)  | 0.73 (0.21-2.48, p=0.612)   |
| 5 - least deprived                        |    | 20 (24.4%)       |     | 68 (21.2%)            |         | 0.92 (0.42-2.01, p=0.844)  | 1.07 (0.36-3.18, p=0.899)   |
| BMI, median value††                       | 52 | 29.5 [27.1-31.7] | 252 | 32.9 [28.7-37.6]      | 0.010   | 0.94 (0.89-0.99, p=0.014)  | 0.97 (0.92-1.02, p=0.240)   |
| Median number of comorbidities††          | 82 | 2 [0-3]          | 321 | 2 [1-4]               | 0.164   | 0.92 (0.82-1.03, p=0.155)  | 0.96 (0.73-1.27, p=0.776)   |
| 0                                         |    | 24 (29.3%)       |     | 66 (20.6%)            | 0.233   | -                          | -                           |
| 1                                         |    | 15 (18.3%)       |     | 62 (19.3%)            |         | 0.67 (0.32-1.38, p=0.275)  | 0.80 (0.29-2.20, p=0.669)   |
| +2                                        |    | 43 (52.4%)       |     | 193 (60.1%)           |         | 0.61 (0.35-1.09, p=0.093)  | 0.82 (0.24-2.79, p=0.752)   |
| Neuro-psychiatric                         | 82 | 12 (14.6%)       | 321 | 99 (30.8%)            | 0.003   | 0.38 (0.19-0.74, p=0.004)  | 0.51 (0.18-1.48, p=0.217)   |
| Admission duration, days†                 | 82 | 11.4 (12.5)      | 321 | 14.6 (18.6)           | 0.138   | 0.99 (0.97-1.00, p=0.141)  | 0.99 (0.95-1.02, p=0.449)   |
| WHO clinical progression scale            | 82 |                  | 321 |                       | 0.084   |                            |                             |
| WHO class 3-4                             |    | 11 (13.4%)       |     | 56 (17.4%)            |         | -                          | -                           |
| WHO class 5                               |    | 39 (47.6%)       |     | 136 (42.4%)           |         | 1.46 (0.70-3.05, p=0.315)  | 1.04 (0.39-2.79, p=0.939)   |
| WHO class 6                               |    | 25 (30.5%)       |     | 71 (22.1%)            |         | 1.79 (0.81-3.95, p=0.148)  | 2.09 (0.69-6.37, p=0.196)   |
| WHO class 7-9                             |    | 7 (8.5%)         |     | 58 (18.1%)            |         | 0.61 (0.22-1.70, p=0.348)  | 0.46 (0.06-3.50, p=0.455)   |
| Systemic steroids                         | 80 | 50 (62.5%)       | 301 | 185 (61.5%)           | 0.865   | 1.05 (0.63-1.74, p=0.865)  | 1.23 (0.61-2.49, p=0.558)   |
| Antibiotic therapy                        | 81 | 64 (79.0%)       | 312 | 246 (78.9%)           | 0.974   | 1.01 (0.55-1.84, p=0.974)  |                             |
| Anti-coagulants                           | 79 | 33 (41.8%)       | 293 | 128 (43.7%)           | 0.761   | 0.92 (0.56-1.53, p=0.761)  |                             |

Data are n (%) unless † mean (SD) or †† median [IQR]. Percentages are calculated by category after exclusion of missing data for that variable. IMD=Index of Multiple Deprivation. BMI=body-mass index. WHO classes are as follows: 3–4=no continuous supplemental oxygen needed; 5=continuous supplemental oxygen only; 6=continuous or bi-level positive airway pressure ventilation or high-flow nasal oxygen; and 7–9=invasive mechanical ventilation or other organ support.

Table S9: Multivariable logistic regression predicting recovery at 1-year in the non-airways group.

|                                           | n   | Recovered<br>(n=459) | n   | Not recovered<br>(n=925) | p value | Univariate<br>OR (95% CI, p) | Multivariate<br>OR (95% CI, p) |
|-------------------------------------------|-----|----------------------|-----|--------------------------|---------|------------------------------|--------------------------------|
| Age†                                      | 459 | 59.4 (13.5)          | 925 | 58.8 (11.3)              | 0.432   | 1.00 (0.99-1.01, p= 0.431)   |                                |
| Age as a factor                           | 459 |                      | 925 |                          | 0.000   |                              |                                |
| <50                                       |     | 110 (24.0%)          |     | 173 (18.7%)              |         | 1.82 (1.32-2.53, p=0.000)    | 1.44 (0.93-2.21, p=0.101)      |
| 50-59                                     |     | 105 (22.9%)          |     | 301 (32.5%)              |         | -                            | -                              |
| 60-69                                     |     | 130 (28.3%)          |     | 281 (30.4%)              |         | 1.33 (0.98-1.78, p=0.069)    | 1.07 (0.72-1.59, p=0.731)      |
| +70                                       |     | 114 (24.8%)          |     | 170 (18.4%)              |         | 1.92 (1.39-2.66, p=0.000)    | 1.55 (0.99-2.43, p=0.054)      |
| Sex at birth                              | 459 |                      | 925 |                          | 0.012   |                              |                                |
| Male                                      |     | 317 (69.1%)          |     | 575 (62.2%)              |         | -                            | -                              |
| Female                                    |     | 142 (30.9%)          |     | 350 (37.8%)              |         | 0.74 (0.58-0.93, p=0.012)    | 0.72 (0.52-0.99, p=0.042)      |
| Ethnicity                                 | 458 |                      | 923 |                          | 0.000   |                              |                                |
| White                                     |     | 312 (68.1%)          |     | 739 (80.1%)              |         | -                            | -                              |
| Non-White                                 |     | 146 (31.9%)          |     | 184 (19.9%)              |         | 1.88 (1.46-2.42, p=0.000)    | 1.92 (1.35-2.72, p=0.000)      |
| Index of multiple deprivation index (IMD) | 454 |                      | 923 |                          | 0.272   |                              |                                |
| 1 - most deprived                         |     | 84 (18.5%)           |     | 220 (23.8%)              |         | 0.72 (0.50-1.03, p=0.069)    | 0.71 (0.46-1.11, p=0.137)      |
| 2                                         |     | 96 (21.2%)           |     | 189 (20.5%)              |         | 0.95 (0.67-1.36, p=0.791)    | 0.90 (0.57-1.43, p=0.668)      |
| 3                                         |     | 89 (19.6%)           |     | 167 (18.1%)              |         | -                            | -                              |
| 4                                         |     | 94 (20.7%)           |     | 178 (19.3%)              |         | 0.99 (0.69-1.42, p=0.960)    | 1.15 (0.73-1.81, p=0.540)      |
| 5 - least deprived                        |     | 91 (20.0%)           |     | 169 (18.3%)              |         | 1.01 (0.70-1.45, p=0.955)    | 1.04 (0.66-1.65, p=0.856)      |
| BMI, median††                             | 318 | 29.4 [26.7-33.4]     | 646 | 31.6 [28.0-35.6]         | 0.000   | 0.95 (0.93-0.98, p=0.000)    | 0.97 (0.95-0.99, p=0.046)      |
| Median number of comorbidities††          | 459 | 1 [0-3]              | 925 | 2 [0-3]                  | 0.005   | 0.91 (0.85-0.97, p=0.002)    | 1.02 (0.88-1.18, p=0.809)      |
| 0                                         |     | 160 (34.9%)          |     | 265 (28.6%)              | 0.029   | -                            | -                              |
| 1                                         |     | 100 (21.8%)          |     | 194 (21.0%)              |         | 0.85 (0.63-1.17, p=0.319)    | 1.05 (0.69-1.62, p=0.813)      |
| +2                                        |     | 199 (43.3%)          |     | 466 (50.4%)              |         | 0.71 (0.55-0.91, p=0.008)    | 0.79 (0.45-1.38, p=0.403)      |
| Neuro-psychiatric                         | 459 | 48 (10.5%)           | 925 | 200 (21.6%)              | 0.000   | 0.42 (0.30-0.59, p=0.000)    | 0.58 (0.35-0.96, p=0.034)      |
| Admission duration, days†                 | 459 | 12.0 (16.0)          | 925 | 16.3 (20.8)              | 0.000   | 0.99 (0.98-0.99, p=0.000)    | 0.99 (0.98-1.00, p=0.236)      |
| WHO clinical progression scale            | 459 |                      | 925 |                          | 0.000   |                              |                                |
| WHO class 3-4                             |     | 67 (14.6%)           |     | 137 (14.8%)              |         | -                            | -                              |
| WHO class 5                               |     | 222 (48.4%)          |     | 375 (40.5%)              |         | 1.21 (0.87-1.69, p=0.265)    | 1.22 (0.78-1.89, p=0.384)      |
| WHO class 6                               |     | 112 (24.4%)          |     | 205 (22.2%)              |         | 1.12 (0.77-1.62, p=0.559)    | 1.10 (0.66-1.84, p=0.711)      |



|                    |     |             |     |             |       |                           |                           |
|--------------------|-----|-------------|-----|-------------|-------|---------------------------|---------------------------|
| WHO class 7-9      |     | 58 (12.6%)  |     | 208 (22.5%) |       | 0.57 (0.38-0.86, p=0.008) | 0.65 (0.33-1.26, p=0.198) |
| Systemic steroids  | 439 | 238 (54.2%) | 872 | 483 (55.4%) | 0.686 | 0.95 (0.76-1.20, p=0.686) | 1.02 (0.74-1.40, p=0.904) |
| Antibiotic therapy | 445 | 341 (76.6%) | 902 | 718 (79.6%) | 0.211 | 0.84 (0.64-1.10, p=0.211) |                           |
| Anti-coagulants    | 440 | 210 (47.7%) | 875 | 425 (48.6%) | 0.773 | 0.97 (0.77-1.22, p=0.773) |                           |

Data are n (%) unless † mean (SD) or †† median [IQR]. Percentages are calculated by category after exclusion of missing data for that variable. IMD=Index of Multiple Deprivation. BMI=body-mass index. WHO classes are as follows: 3–4=no continuous supplemental oxygen needed; 5=continuous supplemental oxygen only; 6=continuous or bi-level positive airway pressure ventilation or high-flow nasal oxygen; and 7–9=invasive mechanical ventilation or other organ support

## Supplementary Figures

**Risk Factors associated with patient-perceived recovery in participants with pre-existing airways diseases at one-year visit**

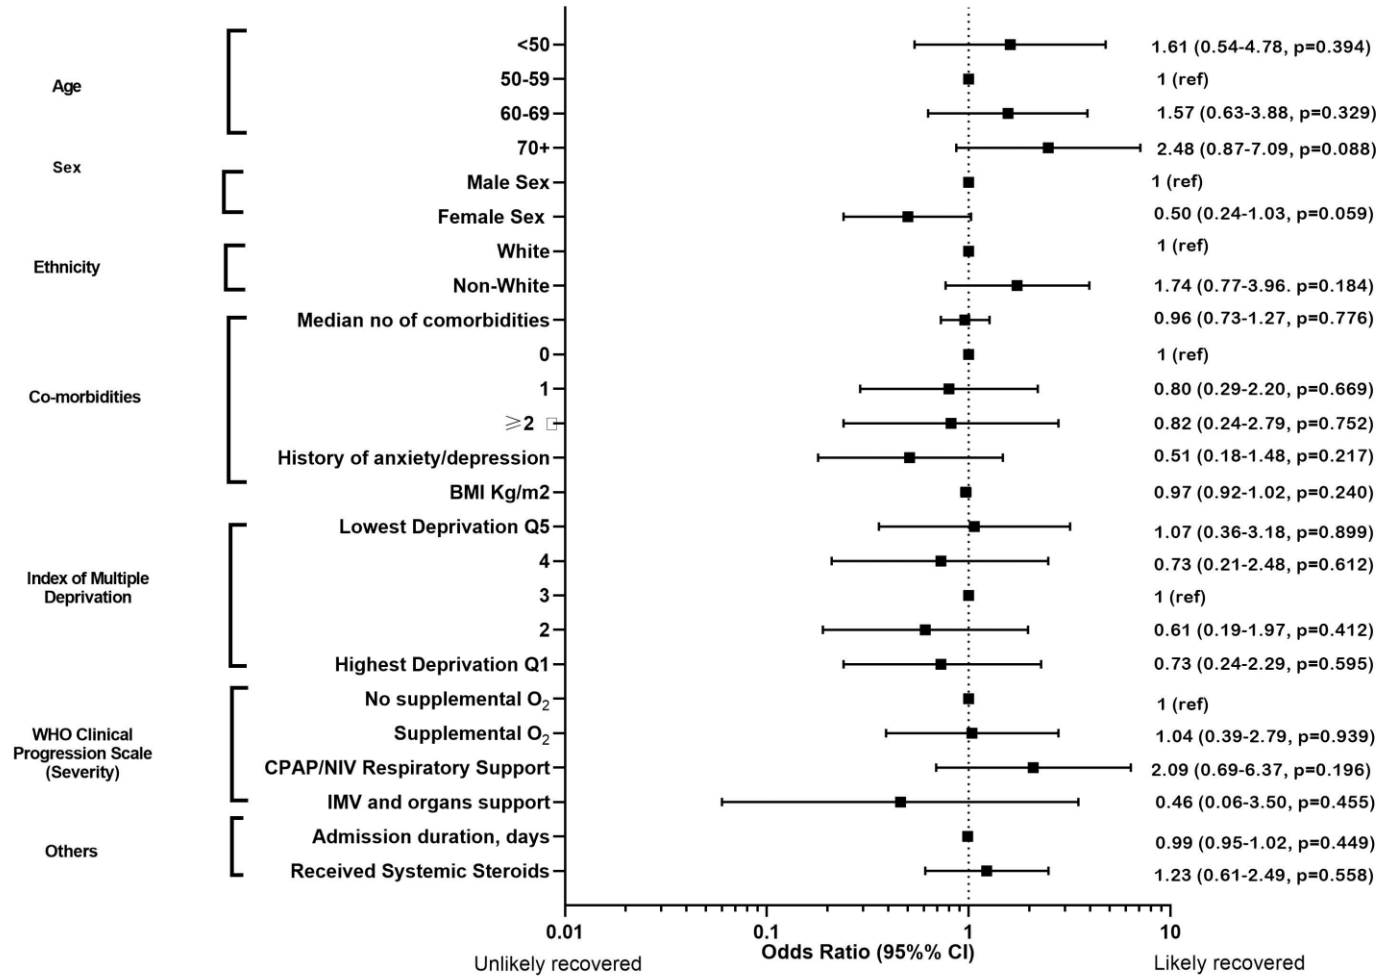



Figure SF2. Risk factors associated with patient perceived recovery in the non-airways group at one-year visit. BMI=Body mass index. CPAP= Continuous positive airway pressure. NIV= Non-invasive ventilation. IMV= Invasive mechanical ventilation.

## **PHOSP-COVID Collaborative Group**

### **Core Management Group**

*Chief Investigator* C E Brightling, *Members* R A Evans (Lead Co-I), L V Wain (Lead Co-I), J D Chalmers, V C Harris, L P Ho, A Horsley, M Marks, K Poinasamy, B Raman, A Shikotra, A Singapuri

### **PHOSP-COVID Study Central Coordinating Team**

C E Brightling (Chief Investigator), R A Evans (*Lead Co-I*), L V Wain (*Lead Co-I*), R Dowling, C Edwardson, O Elneima, S Finney, N J Greening, B Hargadon, V C Harris, L Houchen--Wolloff, O C Leavy, H J C McAuley, C Overton, T Plekhanova, R M Saunders, M Sereno, A Singapuri, A Shikotra, C Taylor, S Terry, C Tong, B Zhao

### **Steering Committee**

*Co-chairs* D Lomas, E Sapey, *Institution representatives* C Berry, C E Bolton, N Brunskill, E R Chilvers, R Djukanovic, Y Ellis, D Forton, N French, J George, N A Hanley, N Hart, L McGarvey, N Maskell, H McShane, M Parkes, D Peckham, P Pfeffer, A Sayer, A Sheikh, A A R Thompson, N Williams and core management group representation

### **Executive Board**

*Chair* C E Brightling, representation from the core management group, each working group and platforms

### **Platforms**

### **Bioresource**

W Greenhalf (*Co-Lead*), M G Semple (*Co-Lead*), M Ashworth, H E Hardwick, L Lavelle-Langham, W Reynolds, M Sereno, R M Saunders, A Singapuri, V Shaw, A Shikotra, B Venson, L V Wain

### **Data Hub**

A B Docherty (*Co-Lead*), E M Harrison (*Co-Lead*), A Sheikh (*Co-Lead*), J K Baillie, C E Brightling, L Daines, R Free, R A Evans, S Kerr, O C Leavy, N I Lone, D Lozano-Rojas, H J C McAuley, K Ntotsis, R Pius, J K Quint, M Richardson, M Sereno, M Thorpe, L V Wain

### **Imaging Alliance**

M Halling-Brown (*Co-Lead*), F Gleeson (*Co-Lead*), J Jacob (*Co-Lead*), S Neubauer (*Co-Lead*) B Raman (*Co-Lead*) S Siddiqui (*Co-Lead*) J M Wild (*Co-Lead*), S Aslani, G Baxter, M Beggs, C Bloomfield, M P Cassar, A Chiribiri, E Cox, D J Cuthbertson, M Halling-Brown, V M Ferreira, L Finnigan, S Francis, P Jezzard, G J Kemp, H Lamlum, E Lukaschuk, C Manisty, G P McCann, C McCracken, K McGlynn, R Menke, C A Miller, A J Moss, T E Nichols, C Nikolaidou, C O'Brien, G Ogbale, B Rangelov, D P O'Regan, A Pakzad, S Piechnik, S Plein, I Propescu, A A Samat, L Saunders, Z B Sanders, R Steeds, T Treibel, E M Tunnicliffe, M Webster, J Willoughby, J Weir McCall, C Xie, M Xu

### **Omics**

L V Wain (*Co-Lead*), J K Baillie (*Co-Lead*), H Baxendale, C E Brightling, M Brown, J D Chalmers, R A Evans, B Gooptu, W Greenhalf, H E Hardwick, R G Jenkins, D Jones, I Koychev, C Langenberg, A Lawrie, P L Molyneaux, A Shikotra, J Pearl, M Ralser, N Sattar, R M Saunders, J T Scott, T Shaw, D Thomas, D Wilkinson

### **Working Groups**

#### **Airways**

L G Heaney (*Co-Lead*), A De Soyza (*Co-Lead*), D Adeloye, C E Brightling, J S Brown, J Busby, J D Chalmers, C Echevarria, L Daines, O Elneima, R A Evans, J R Hurst, P Novotny, C Nicolaou, P Pfeffer, K Poinasamy, J K Quint, I Rudan, E Sapey, M Shankar-Hari, A Sheikh, S Siddiqui, S Walker, B Zheng

#### **Brain**

J R Geddes (*Lead*), M Hotopf (*Co-Lead*), K Abel, R Ahmed, L Allan, C Armour, D Baguley, D Baldwin, C Ballard, K Bhui, G Breen, K Breeze, M Broome, T Brugha, E Bullmore, D Burn, F Callard, J Cavanagh, T Chalder, D Clark, A David, B Deakin, H Dobson, B Elliott, J Evans, RA Evans, R Francis, E Guthrie, P Harrison, M Henderson, A Hosseini, N Huneke, M Husain, T Jackson, I Jones, T Kabir, P Kitterick, A Korszun, I Koychev, J Kwan, A Lingford-Hughes, P Mansoori, H McAllister-Williams, K McIvor, B Michael, L Milligan, R Morriss, E Mukaetova-Ladinska, K Munro, A Nevado-Holgado, T Nicholson, C Nicolaou, S Paddick, C Pariente, J Pimm, K Saunders, M Sharpe, G Simons, J P Taylor, R Uptegrove, S Wessely

### **Cardiac**

G P McCann (*Lead*), S Amoils, C Antoniadou, A Banerjee, A Bularga, C Berry, P Chowienczyk, J P Greenwood, A D Hughes, K Khunti, C Lawson, N L Mills, A J Moss, S Neubauer, B Raman, A N Sattar, C L Sudlow, M Toshner,

### **Immunology**

P J M Openshaw (*Lead*), D Altmann, J K Baillie, R Batterham, H Baxendale, N Bishop, C E Brightling, P C Calder, C M Efstathiou, R A Evans, J L Heeney, T Hussell, P Klenerman, F Liew, J M Lord, P Moss, S L Rowland-Jones, W Schwaible, M G Semple, R S Thwaites, L Turtle, L V Wain, S Walmsley, D Wraith

### **Intensive Care**

M J Rowland (*Lead*), A Rostron (*Co-Lead*), J K Baillie, B Connolly, A B Docherty, N I Lone, D F McAuley, D Parekh, A Rostron, J Simpson, C Summers

### **Lung Fibrosis**

R G Jenkins (*Co-Lead*), J Porter (*Co-Lead*), R J Allen, R Aul, J K Baillie, S Barratt, P Beirne, J Blaikley, R C Chambers, N Chaudhuri, C Coleman, E Denny, L Fabbri, P M George, M Gibbons, F Gleeson, B Gooptu, B Guillen Guio, I Hall, N A Hanley, L P Ho, E Hufton, J Jacob, I Jarrold, G Jenkins, S Johnson, M G Jones, S Jones, F Khan, P Mehta, J Mitchell, P L Molyneaux, J E Pearl, K Piper Hanley, K Poinasamy, J Quint, D Parekh, P Rivera-Ortega, L C Saunders, M G Semple, J Simpson, D Smith, M Spears, L G Spencer, S Stanel, I Stewart, A A R Thompson, D Thickett, R Thwaites, L V Wain, S Walker, S Walsh, J M Wild, D G Wootton, L Wright

### **Metabolic**

S Heller (*Co-Lead*), M J Davies (*Co-Lead*), H Atkins, S Bain, J Dennis, K Ismail, D Johnston, P Kar, K Khunti, C Langenberg, P McArdle, A McGovern, T Peto, J Petrie, E Robertson, N Sattar, K Shah, J Valabhji, B Young

### **Pulmonary and Systematic Vasculature**

L S Howard (*Co-Lead*), Mark Toshner (*Co-Lead*), C Berry, P Chowienczyk, A Lawrie, O C Leavy, J Mitchell, J Newman, L Price, J Quint, A Reddy, J Rossdale, N Sattar, C Sudlow, A A R Thompson, J M Wild, M Wilkins

### **Rehabilitation, Sarcopenia and Fatigue**

S J Singh (*Co-Lead*), W D-C Man (*Co-Lead*), J M Lord (*Co-Lead*), N J Greening (*Co-Lead*), T Chalder (*Co-Lead*), J T Scott (*Co-Lead*), N Armstrong, E Baldry, M Baldwin, N Basu, M Beadsworth, L Bishop, C E Bolton, A Briggs, M Buch, G Carson, J Cavanagh, H Chinoy, C Dawson, E Daynes, S Defres, R A Evans, L Gardiner, P Greenhaff, S Greenwood, M Harvie, L Houchen-Wolloff, M Husain, S MacDonald, A McArdle, H J C McAuley, A McMahon, M McNarry, G Mills, C Nolan, K O'Donnell, D Parekh, Pimm, J Sargent, L Sigfrid, M Steiner, D Stensel, A L Tan, I Vogiatzis, J Whitney, D Wilkinson, D Wilson, M Witham, D G Wootton, T Yates

### **Renal**

D Thomas (*Lead*), N Brunskill (*Co-Lead*), S Francis (*Co-Lead*), S Greenwood (*Co-Lead*), C Laing (*Co-Lead*), K Bramham, P Chowdhury, A Frankel, L Lightstone, S McAdoo, K McCafferty, M Ostermann, N Selby, C Sharpe, M Willicombe

### **Patient Public Engagement Group**

L Houchen-Wolloff (*Lead*), J Bunker, R Gill, C Hastie, R Nathu, N Rogers, N Smith

### **Local Clinical Centre PHOSP-COVID trial staff**

(listed in alphabetical order)

### **Airedale NHS Foundation Trust**

A Shaw (PI), L Armstrong, B Hairsine, H Henson, C Kurasz, L Shenton

### **Aneurin Bevan University Health Board**

S Fairbairn (PI), A Dell, N Hawkings, J Haworth, M Hoare, A Lucey, V Lewis, G Mallison, H Nassa, C Pennington, A Price, C Price, A Storrle, G Willis, S Young

**Barts Health NHS Trust & Queen Mary University of London**

P Pfeffer (PI), K Chong-James, C David, W Y James, C Manisty, A Martineau, O Zongo

**Barnsley Hospital NHS Foundation Trust**

A Sanderson (PI)

**Belfast Health and Social Care Trust & Queen's University Belfast**

L G Heaney (PI), C Armour, V Brown, T Craig, S Drain, B King, N Magee, D McAulay, E Major, L McGarvey, J McGinness, R Stone

**Betsi Cadwaladr University Health Board**

A Haggart (PI), A Bolger, F Davies, J Lewis, A Lloyd, R Manley, E McIvor, D Menzies, K Roberts, W Saxon, D Southern, C Subbe, V Whitehead

**Borders General Hospital, NHS Borders**

H El-Taweel (PI), J Dawson, L Robinson

**Bradford Teaching Hospitals NHS Foundation Trust**

D Saralaya (PI), L Brear, K Regan, K Storton

**Cambridge University Hospitals NHS Foundation Trust, NIHR Cambridge Clinical Research Facility & University of Cambridge**

J Fuld (PI), A Bermperi, I Cruz, K Dempsey, A Elmer, H Jones, S Jose, S Marciniak, M Parkes, C Ribeiro, J Taylor, M Toshner, L Watson, J Weir McCall, J Worsley

**Cardiff and Vale University Health Board**

R Sabit (PI), L Broad, A Buttress, T Evans, M Haynes, L Jones, L Knibbs, A McQueen, C Oliver, K Paradowski, J Williams



**Chesterfield Royal Hospital NHS Trust**

E Harris (PI), C Sampson

**Cwm Taf Morgannwg University Health Board**

C Lynch (PI), E Davies, C Evenden , A Hancock, K Hancock, M Rees , L Roche, N Stroud, T Thomas-Woods

**East Cheshire NHS Trust**

M Babores (PI), J Bradley-Potts, M Holland, N Keenan, S Shashaa, H Wassall

**East Kent Hospitals University NHS Foundation Trust**

E Beranova (PI), H Weston (PI), T Cosier, L Austin, J Deery, T Hazelton, C Price, H Ramos, R Solly, S Turney

**Gateshead NHS Trust**

L Pearce (PI), W McCormick, S Pugmire, W Stoker, A Wilson

**Guy's and St Thomas' NHS Foundation Trust**

N Hart (PI), LA Aguilar Jimenez, G Arbane, S Betts, K Bisnauthsing, A Dewar, P Chowdhury, A Chiribiri, A Dewar, G Kaltsakas, H Kerslake, MM Magtoto, P Marino, LM Martinez, C O'Brien, M Ostermann, J Rossdale, TS Solano, E Wynn

**Hampshire Hospitals NHS Foundation Trust**

N Williams (PI), W Storrar (PI), M Alvarez Corral, A Arias, E Bevan, D Griffin, J Martin, J Owen,  
S Payne, A Prabhu, A Reed, C Wrey Brown

**Harrogate and District NHD Foundation Trust**

C Lawson (PI), T Burdett, J Featherstone, A Layton, C Mills, L Stephenson,

**Hull University Teaching Hospitals NHS Trust & University of Hull**

N Easom (PI), P Atkin, K Brindle, M G Crooks, K Drury, R Flockton, L Holdsworth, A Richards, D L Sykes, S Thackray-Nocera, C Wright

**Hywel Dda University Health Board**

K E Lewis (PI), A Mohamed (PI), G Ross (PI), S Coetzee, K Davies, R Hughes, R Loosley, L O'Brien, Z Omar, H McGuinness, E Perkins, J Phipps, A Taylor, H Tench, R Wolf-Roberts

**Imperial College Healthcare NHS Trust & Imperial College London**

L S Howard (PI), O Kon (PI), D C Thomas (PI), S Anifowose, L Burden, E Calvelo, B Card, C Carr, E R Chilvers, D Copeland, P Cullinan, P Daly, C M Efstathiou, L Evison, T Fayzan, H Gordon, S Haq, R G Jenkins, C King, F Liew, K March, M Mariveles, L McLeavey, N Mohamed, S Moriera, U Munawar, J Nunag, U Nwanguma, L Orriss- Dib, D P O'Regan, A Ross, M Roy, E Russell, K Samuel, J Schronce, N Simpson, L Tarusan, C Wood, N Yasmin

**Kettering General Hospital NHS Trust**

R Reddy (PI), A-M Guerdetto, M Hewitt, K Warwick, S White

**King's College Hospital NHS Foundation Trust & Kings College London**

A M Shah (PI), C J Jolley (PI), O Adeyemi, R Adrege, H Assefa-Kebede, J Breeze, M Brown, S Byrne, T Chalder, A Chiribiri, P Dulawan, N Hart, A Hayday, A Hoare, A Knighton, M Malim, C O'Brien, S Patale, I Peralta, N Powell, A Ramos, K Shevket, F Speranza, A Te

**Leeds Teaching Hospitals & University of Leeds**

P Beirne (PI), A Ashworth, J Clarke, C Coupland, M Dalton, E Wade, C Favager, J Greenwood, J Glossop, L Hall, T Hardy, A Humphries, J Murira, D Peckham, S Plein, J Rangeley, G Saalmink, A L Tan, B Whittam, N Window, J Woods,

**Lewisham & Greenwich NHS Trust**

G Coakley (PI)

**Liverpool University Hospitals NHS Foundation Trust & University of Liverpool**

D G Wootton (PI), L Turtle (PI), L Allerton, AM All, M Beadsworth, A Berridge, J Brown, S Cooper, A Cross, D J Cuthbertson, S Defres, S L Dobson, J Earley, N French, W Greenhalf, H E Hardwick, K Hainey, J Hawkes, V Highett, S Kaprowska, G J Kemp, AL Key, S Koprowska, L Lavelle-Langham, N Lewis-Burke, G Madzamba, F Malein, S Marsh, C Mears, L Melling, M J Noonan, L Poll, J Pratt, E Richardson, A Rowe, M G Semple, V Shaw, K A Tripp, B Vinson, L O Wajero, S A Williams-Howard, J Wyles

**London North West University Healthcare NHS Trust**

S N Diwanji (PI), P Papineni (PI), S Gurram, S Quaid, G F Tiongson, E Watson

**Manchester University NHS Foundation Trust & University of Manchester**

B Al-Sheklly (PI), A Horsley (PI), C Avram, P Barran, J Blaikely, M Buch, N Choudhury, D Faluyi, T Felton, T Gorsuch, N A Hanley, T Hussell, Z Kausar, C A Miller, N Odell, R Osbourne, K Piper Hanley, K Radhakrishnan, S Stockdale, D Trivedi

**Newcastle upon Tyne Hospitals NHS Foundation Trust & University of Newcastle**

A De Soyza (PI), C Echevarria (PI), A Ayoub, J Brown, G Burns, G Davies, H Fisher, C Francis, A Greenhalgh, P Hogarth, J Hughes, K Jiwa, G Jones, G MacGowan, D Price, A Sayer, J Simpson, H Tedd, S Thomas, S West, M Witham, S Wright, A Young

**NHS Dumfries and Galloway**

M J McMahon (PI), P Neill

**NHS Greater Glasgow and Clyde Health Board & University of Glasgow**

D Anderson (PI), H Bayes (PI), C Berry (PI), D Grieve (PI), I B McInnes (PI), N Basu, A Brown, A Dougherty, K Fallon, L Gilmour, K Mangion, A Morrow, K Scott, R Sykes, R Touyz

**NHS Highland**

E K Sage (PI), F Barrett, A Donaldson

**NHS Lanarkshire**

M Patel (PI), D Bell, A Brown, M Brown, R Hamil, K Leitch, L Macliver, J Quigley, A Smith, B Welsh

**NHS Lothian & University of Edinburgh**

G Choudhury (PI), J K Baillie, S Clohisey, A Deans, A B Docherty, J Furniss, E M Harrison, S Kelly, N I Lone, D E Newby, A Sheikh

**NHS Tayside & University of Dundee**

J D Chalmers (PI), D Connell, A Elliott, C Deas, J George, S Mohammed, J Rowland, A R Solstice, D Sutherland, C J Tee

**North Bristol NHS Trust & University of Bristol**

N Maskell (PI), D Arnold, S Barrett, H Adamali, A Dipper, S Dunn, A Morley, L Morrison, L Stadon, S Waterson, H Welch

**North Middlesex Hospital NHS Trust**

B Jayaraman (PI), T Light

**Nottingham University Hospitals NHS Trust & University of Nottingham**

C E Bolton (PI), P Almeida, J Bonnington, M Chrystal, E Cox, C Dupont, S Francis, P Greenhaff, A Gupta, L Howard, W Jang, S Linford, L Matthews, R Needham, A Nikolaidis, S Prosper, K Shaw, A K Thomas

**Oxford University Hospitals NHS Foundation Trust & University of Oxford**

L P Ho (PI), N M Rahman (PI), M Ainsworth, A Alamoudi, M Beggs, A Bates, A Bloss, A Burns, P Carter, M Cassar, K M Channon, J Chen, F Conneh, T Dong, R I Evans, E Fraser, X Fu, J R Geddes, F Gleeson, P Harrison, M Havinden-Williams, P Jezzard, N Kanellakis, I Koychev, P Kurupati, X Li, E Lukaschuk, K McGlynn, H McShane, C

Megson, K Motohashi, S Neubauer, D Nicoll, G Ogg, E Pacpaco, M Pavlides, Y Peng, N Petousi, J Propescu, N Rahman, B Raman, M J Rowland, K Saunders, M Sharpe, N Talbot, E Tunnicliffe

**Royal Brompton and Harefield Clinical Group, Guy's and St Thomas' NHS Foundation Trust.**

W D-C Man (PI), B Patel (PI), R E Barker, D Cristiano, N Dormand, M Gummadi, S Kon, K Liyanage, C M Nolan, S Patel, O Polgar, P Shah, S J Singh, J A Walsh

**Royal Free London NHS Foundation Trust**

J Hurst (PI), H Jarvis (PI), S Mandal (PI), S Ahmad, S Brill, L Lim, D Matila, O Olaosebikan, C Singh

**Royal Papworth Hospital NHS Foundation Trust**

M Toshner (PI), H Baxendale, L Garner, C Johnson, J Mackie, A Michael, J Pack, K Paques, H Parfrey, J Parmar

**Salford Royal NHS Foundation Trust**

N Diar Bakerly (PI), P Dark, D Evans, E Hardy, A Harvey, D Holgate, S Knight, N Mairs, N Majeed, L McMorrow, J Oxtton, J Pendlebury, C Summersgill, R Ugwuoke, S Whittaker

**Salisbury NHS Foundation Trust**

W Matimba-Mupaya (PI), S Strong-Sheldrake

**Sheffield Teaching NHS Foundation Trust & University of Sheffield**

S L Rowland-Jones (PI), A A R Thompson (Co PI), J Bagshaw, M Begum, K Birchall, R Butcher, H Carborn, F Chan, K Chapman, Y Cheng, L Chetham, C Clark, Z Coburn, J Cole, M Dixon, A Fairman, J Finnigan, L Finnigan, H Foot, D Foote, A Ford, R Gregory, K Harrington, L Haslam, L Hesselden, J Hockridge, A Holbourn, B Holroyd-Hind, L Holt, A Howell, E Hurditch, F Ilyas, C Jarman, A Lawrie, E Lee, J-H Lee, R Lenagh, A Lye, I Macharia, M Marshall, A Mbuyisa, J McNeill, S Megson, J Meiring, L Milner, S Misra, H Newell, T Newman, C Norman, L Nwafor, D Pattenadk, M Plowright, J Porter, P Ravencroft, C Roddis, J Rodger, P Saunders, J Sidebottom, J Smith, L Smith, N Steele, G Stephens, R Stimpson, B Thamu, N Tinker, K Turner, H Turton, P Wade, S Walker, J Watson, J M Wild, I Wilson, A Zawia

**St George's University Hospitals NHS Foundation Trust**

R Aul (PI), M Ali, A Dunleavy (PI), D Forton, N Msimanga, M Mencias, T Samakomva, S Siddique, J Teixeira, V Tavoukjian

**Sherwood Forest Hospitals NHS Foundation Trust**

J Hutchinson (PI), L Allsop, K Bennett, P Buckley, M Flynn, M Gill, C Goodwin, M Greatorex, H Gregory, C Heeley, L Holloway, M Holmes, J Kirk, W Lovegrove, TA Sewell, S Shelton, D Sissons, K Slack, S Smith, D Sowter, S Turner, V Whitworth, I Wynter

**Shropshire Community Health NHS Trust**

L Warburton (PI), S Painter, J Tomlinson

**Somerset NHS Foundation Trust**

C Vickers (PI), T Wainwright, D Redwood, J Tilley, S Palmer

**Swansea Bay University Health Board**

G A Davies (PI), L Connor, A Cook, T Rees, F Thaivalappil, C Thomas

**Tameside and Glossop Integrated Care NHS Foundation**

A Butt (PI), M Coulding, H Jones, S Kilroy, J McCormick, J McIntosh, H Savill, V Turner, J Vere

**The Great Western Hospital Foundation Trust**

E Fraile (PI), J Ugoji

**The Hillingdon Hospitals NHS Foundation Trust**

S S Kon (PI), H Lota, G Landers, M Nasser, S Portukhay

**The Rotherham NHS Foundation Trust**

A Hormis (PI), A Daniels, J Ingham, L Zeidan

**United Lincolnshire Hospitals NHS Trust**

M Chablani (PI), L Osborne

**University College London Hospital & University College London**

M Marks (PI), J S Brown (PI), N Ahwireng, B Bang, D Basire, R C Chambers, A Checkley, R Evans, M Heightman, T Hillman, J Hurst, J Jacob, S Janes, R Jastrub, M Lipman, S Logan, D Lomas, M Merida Morillas, A Pakzad, H Plant, J C Porter, K Roy, E Wall, B Williams, M Xu

**University Hospital Birmingham NHS Foundation Trust & University of Birmingham**

D Parekh (PI), N Ahmad Haider, C Atkin, R Baggott, M Bates, A Botkai, A Casey, B Cooper, J Dasgin, K Draxlbauer, N Gautam, J Hazeldine, T Hiwot, S Holden, K Isaacs, T Jackson, S Johnson, V Kamwa, D Lewis, J M Lord, S Madathil, C McGhee, K Mcgee, A Neal, A Newton Cox, J Nyaboko, D Parekh, Z Peterkin, H Qureshi, B Rangelov, L Ratcliffe, E Sapey, J Short, T Soulsby, R Steeds, J Stockley, Z Suleiman, T Thompson, M Ventura, S Walder, C Welch, D Wilson, S Yasmin, K P Yip

**University Hospitals of Derby and Burton**

P Beckett (PI) C Dickens, U Nanda

**University Hospitals of Leicester NHS Trust & University of Leicester**

C E Brightling (CI), R A Evans (PI), M Aljarroof, N Armstrong, H Arnold, H Aung, M Bakali, M Bakau, M Baldwin, M Bingham, M Bourne, C Bourne, N Brunskill, P Cairns, L Carr, A Charalambou, C Christie, M J Davies, S Diver, S Edwards, C Edwardson, O Elneima, H Evans, J Finch, S Glover, N Goodman, B Gootpu, N J Greening, K Hadley, P Haldar, B Hargadon, V C Harris, L Houchen-Wolloff, W Ibrahim, L Ingram, K Khunti, A Lea, D Lee, D Lozano-Rojas, G P McCann, H J C McAuley, P McCourt, T McNally, G Mills, A Moss, W Monteiro, K Ntotsis, M Pareek, S Parker, A Rowland, A Prickett, I N Qureshi, R J Russell, N Samani, M Sereno, M Sharma, A Shikotra, S Siddiqui, A Singapuri, S J Singh, J Skeemer, M Soares, E Stringer, T Thornton, M Tobin, E Turner, L V Wain, T J C Ward, F Woodhead, J Wormleighton, T Yates, A Yousuf,

**University Hospital Southampton NHS Foundation Trust & University of Southampton**

M G Jones (PI), C Childs, R Djukanovic, S Fletcher, M Harvey, E Marouzet, B Marshall, R Samuel, T Sass, T Wallis, H Wheeler

**Whittington Health NHS**

R Dharmagunawardena (PI), E Bright, P Crisp, M Stern

**Wirral University Teaching Hospital**

A Wight (PI), L Bailey, A Reddington

**Wrightington Wigan and Leigh NHS trust**

A Ashish (PI), J Cooper, E Robinson

**Yeovil District Hospital NHS Foundation Trust**

A Broadley (PI)

**York & Scarborough NHS Foundation Trust**

K Howard (PI), L Barman, C Brookes, K Elliott, L Griffiths, Z Guy, D Ionita, H Redfearn, C Sarginson

A Turnbull

**Health and Care Research Wales**

Y Ellis

**London School of Hygiene & Tropical Medicine (LSHTM)**

M Marks, A Briggs



**NIHR Office for Clinical Research Infrastructure**

K Holmes

**Patient Public Involvement Leads**

Asthma UK and British Lung Foundation Partnership - K Poinasamy, S Walker

**Royal Surrey NHS Foundation Trust**

M Halling-Brown

**South London and Maudsley NHS Foundation Trust & Kings College London**

G Breen, M Hotopf

**Swansea University & Swansea Welsh Network**

K Lewis, N Williams

## References

1. Office for National Statistics. National Statistics Postcode Lookup (February 2020). February 02, 2020. <https://geoportal.statistics.gov.uk/datasets/national-statistics-postcode-lookup-february2020> (accessed December 01, 2022).
2. WHO Working Group on the Clinical Characterisation and Management of COVID-19 infection. "A minimal common outcome measure set for COVID-19 clinical research." *The Lancet. Infectious diseases* 2020; **20**(8): e192-e197.
3. Johnson SU, Ulvenes PG, Øktedalen T, Hoffart A. Psychometric properties of the general anxiety disorder 7-item (GAD-7) scale in a heterogeneous psychiatric sample. *Front Psychol* 2019; **10**:1713.
4. Levis B, Benedetti A, Thombs BD. Accuracy of Patient Health Questionnaire-9 (PHQ-9) for screening to detect major depression: individual participant data meta-analysis. *BMJ* 2019; **365**:l1476.
5. Contractor AA, Elhai JD, Fine TH, et al. Latent profile analyses of posttraumatic stress disorder, depression and generalized anxiety disorder symptoms in trauma-exposed soldiers. *J Psychiatr Res* 2015; **68**: 19-26.
6. Weathers FWL, B.T. Keane, T.M. Palmieri, P.A. Marx, B.P. & Schnurr, P.P. The PTSD Checklist for DSM-5 (PCL-5). 2013. [www.ptsd.va.gov](http://www.ptsd.va.gov) (accessed May 30, 2023).
7. Yorke J, Moosavi SH, Shuldham C, Jones PW. Quantification of dyspnoea using descriptors: development and initial testing of the Dyspnoea-12. *Thorax* 2010; **65**(1): 21-6.
8. FACIT.org. Functional Assessment of Chronic Illness Therapy – Fatigue: A 13-item FACIT Fatigue Scale. <https://www.facit.org/measures/FACIT-F> (accessed May 30, 2023).
9. Butt Z, Lai JS, Rao D, Heinemann AW, Bill A, Cella D. Measurement of fatigue in cancer, stroke, and HIV using the Functional Assessment of Chronic Illness Therapy - Fatigue (FACIT-F) scale. *J Psychosom Res* 2013; **74**(1): 64-8.
10. Vasunilashorn S, Coppin AK, Patel KV, et al. Use of the Short Physical Performance Battery Score to predict loss of ability to walk 400 meters: analysis from the InCHIANTI study. *J Gerontol A Biol Sci Med Sci* 2009; **64**(2): 223-9.
11. Guralnik JM, Simonsick EM, Ferrucci L, et al. A short physical performance battery assessing lower extremity function: association with self-reported disability and prediction of mortality and nursing home admission. *J Gerontol* 1994; **49**(2): M85-M94.
12. Fish J. Short Physical Performance Battery. In: Kreutzer JS, DeLuca J, Caplan B, eds. *Encyclopedia of Clinical Neuropsychology*. New York, NY: Springer New York; 2011: 2289-91.

13. Singh SJ, Morgan M, Scott S, Walters D, Hardman AE. Development of a shuttle walking test of disability in patients with chronic airways obstruction. *Thorax* 1992; **47**(12): 1019-24.
14. Probst VS, Hernandez NA, Teixeira DC, et al. Reference values for the incremental shuttle walking test. *Respir Med* 2012; **106**(2): 243-8.
15. Rockwood K, Song X, MacKnight C, et al. A global clinical measure of fitness and frailty in elderly people. *CMAJ* 2005; **173**(5): 489-95.
16. Nasreddine ZS. MoCA Montreal Cognitive Assessment Training & Certification. <https://www.mocatest.org/training-certification/> (accessed May 30, 2023).
17. Carson N, Leach L, Murphy KJ. A re-examination of Montreal Cognitive Assessment (MoCA) cutoff scores. *Int J Geriatr Psychiatry* 2018; **33**(2): 379-88.
18. Graham BL, Steenbruggen I, Miller MR, et al. Standardization of spirometry 2019 update. An official American thoracic Society and European respiratory Society technical statement. *Am J Respir Crit Care Med* 2019; **200**(8): e70-e88.
19. Quanjer PH, Stanojevic S, Cole TJ, et al. Multi-ethnic reference values for spirometry for the 3–95-yr age range: the global lung function 2012 equations. *Eur Respiratory Soc*; 2012. 40
20. Stanojevic S, Graham BL, Cooper BG, et al. Official ERS technical standards: Global Lung Function Initiative reference values for the carbon monoxide transfer factor for Caucasians (vol 50, 1700010, 2017). *Eur Respir J* 2020; **56**(4).
21. Stanojevic S, Graham BL, Cooper BG, et al. Official ERS technical standards: Global Lung Function Initiative reference values for the carbon monoxide transfer factor for Caucasians. *Eur Respir J* 2017; **50**(3).
22. Vestbo J, Hurd SS, Agustí AG, et al. Global strategy for the diagnosis, management, and prevention of chronic obstructive pulmonary disease: GOLD executive summary. *Am J Respir Crit Care Med* 2013; **187**(4): 347-65.
23. Acute heart failure: diagnosis and management. National Institute for Health and Care Excellence; 2014.
24. Chronic heart failure in adults: diagnosis and management. National Institute for Health and Care Excellence; 2018.
25. International Expert Committee Report on the Role of the A1C Assay in the Diagnosis of Diabetes. *Diabetes Care* 2009; **32**(7): 1327-34.
26. Evans RA, McAuley H, Harrison EM, et al. Physical, cognitive, and mental health impacts of COVID-19 after hospitalisation (PHOSP-COVID): a UK multicentre, prospective cohort study. *Lancet Respir Med*. 2021;9(11):1275-1287
27. Gerlinger C, Bamber L, Leverkus F, et al. Comparing the EQ-5D-5L utility index based on value sets of different countries: impact on the interpretation of clinical study results. *BMC Res Notes* 2019; **12**(1): 1-6.
28. Herdman M, Gudex C, Lloyd A, et al. Development and preliminary testing of the new five level version of EQ-5D (EQ-5D-5L). *Qual Life Res* 2011; **20**(10): 1727-36.
29. Creating Disability Severity Indicators Using the WG Short Set on Functioning (WG-SS) (CSPro). January 2021. [https://www.washingtongroup-disability.com/fileadmin/uploads/wg/WG\\_Document\\_\\_5H\\_-\\_Analytic\\_Guidelines\\_for\\_the\\_WG-SS\\_\\_Severity\\_Indicators\\_-\\_CSPro\\_.pdf](https://www.washingtongroup-disability.com/fileadmin/uploads/wg/WG_Document__5H_-_Analytic_Guidelines_for_the_WG-SS__Severity_Indicators_-_CSPro_.pdf) (accessed May 30, 2023).
